# Supplementary material for: From helices to superhelices: hierarchical assembly of homochiral van der Waals 1D coordination polymers
Source: Royal Society of Chemistry journal article supplement (doi:10.1039/d1sc01913a), 2021-01-01
Supplement: d1sc01913a1.pdf [file d1sc01913a1.pdf]

## Supporting Information

### **From helix to superhelix: hierarchical assembly of homochiral van der Waals 1D coordination polymers**

Guo-Guo Weng,<sup>a</sup> Ben-Kun Hong,<sup>b</sup> Song-Song Bao,<sup>a</sup> Yujie Wen,<sup>c</sup> Lan-Qing Wu,<sup>a</sup> Xin-Da Huang,<sup>a</sup> Jia-Ge Jia,<sup>a</sup> Ge-Hua Wen,<sup>a</sup> Shu-Hua Li,<sup>b</sup> Luming Peng,<sup>c</sup> Li-Min Zheng<sup>\*a</sup>

<sup>a</sup>State Key Laboratory of Coordination Chemistry, School of Chemistry and Chemical Engineering, Collaborative Innovation Center of Advanced Microstructures, Nanjing University, Nanjing 210023, P. R. China. Email: lmzheng@nju.edu.cn

<sup>b</sup>Institute of Theoretical and Computational Chemistry, School of Chemistry and Chemical Engineering, Nanjing University, Nanjing 210023, People's Republic of China.

<sup>c</sup>Key Laboratory of Mesoscopic Chemistry of MOE and Collaborative Innovation Center of Chemistry for Life Sciences, School of Chemistry and Chemical Engineering, Nanjing University, Nanjing 210023, People's Republic of China

**Table S1.** Crystallographic data for **S-2C** and **R-2C**.

| <b>Compound</b>                                                             | <b>S-2C</b>                                                                      | <b>R-2C</b>                                                                      |
|-----------------------------------------------------------------------------|----------------------------------------------------------------------------------|----------------------------------------------------------------------------------|
| Formula                                                                     | C <sub>29</sub> H <sub>65</sub> N <sub>3</sub> O <sub>13</sub> P <sub>3</sub> Tb | C <sub>29</sub> H <sub>65</sub> N <sub>3</sub> O <sub>13</sub> P <sub>3</sub> Tb |
| <i>M</i>                                                                    | 915.67                                                                           | 915.67                                                                           |
| Temperature (K)                                                             | 193                                                                              | 193                                                                              |
| Crystal system                                                              | hexagonal                                                                        | hexagonal                                                                        |
| Space group                                                                 | <i>P</i> 6 <sub>1</sub>                                                          | <i>P</i> 6 <sub>5</sub>                                                          |
| <i>a</i> (Å)                                                                | 17.0310(6)                                                                       | 17.0143(5)                                                                       |
| <i>b</i> (Å)                                                                | 17.0310(6)                                                                       | 17.0143(5)                                                                       |
| <i>c</i> (Å)                                                                | 23.5742(12)                                                                      | 23.5290(10)                                                                      |
| <i>V</i> (Å <sup>3</sup> )                                                  | 5921.7(5)                                                                        | 5898.8(4)                                                                        |
| <i>Z</i>                                                                    | 6                                                                                | 6                                                                                |
| <i>D</i> <sub>c</sub> (g cm <sup>-3</sup> )                                 | 1.541                                                                            | 1.547                                                                            |
| $\mu$ (mm <sup>-1</sup> )                                                   | 10.389                                                                           | 1.982                                                                            |
| <i>F</i> (000)                                                              | 2844                                                                             | 2844                                                                             |
| <i>R</i> <sub>int</sub>                                                     | 0.0804                                                                           | 0.0512                                                                           |
| <i>GOF</i>                                                                  | 1.035                                                                            | 1.039                                                                            |
| <i>R</i> <sub>1</sub> , <i>wR</i> <sub>2</sub> [ <i>I</i> > 2σ( <i>I</i> )] | 0.0368, 0.0889                                                                   | 0.0255, 0.0574                                                                   |
| <i>R</i> <sub>1</sub> , <i>wR</i> <sub>2</sub> (all data)                   | 0.0395, 0.0907                                                                   | 0.0295, 0.0597                                                                   |
| Flack parameter                                                             | -0.009(3)                                                                        | -0.010(5)                                                                        |
| CCDC                                                                        | 2034187                                                                          | 2034186                                                                          |

$$^a R_1 = \sum ||F_o| - |F_c|| / \sum |F_o|. \quad wR_2 = [\sum w(F_o^2 - F_c^2)^2 / \sum w(F_o^2)^2]^{1/2}$$

**Table S2.** Selected bond lengths (Å) and bond angles (°) for **S-2C** at 193 K.

|             |            |            |            |
|-------------|------------|------------|------------|
| Tb1-O7      | 2.280(4)   | P1-O3      | 1.499(4)   |
| Tb1-O5A     | 2.312(4)   | P1-O2      | 1.523(4)   |
| Tb1-O8A     | 2.329(4)   | P1-O1      | 1.535(4)   |
| Tb1-O1B     | 2.352(4)   | P2-O6      | 1.494(5)   |
| Tb1-O2      | 2.417(4)   | P2-O4      | 1.525(4)   |
| Tb1-O5      | 2.468(4)   | P2-O5      | 1.530(5)   |
| Tb1-O4      | 2.471(4)   | P3-O9      | 1.508(5)   |
| Tb1-O1      | 2.518(4)   | P3-O7      | 1.514(5)   |
|             |            | P3-O8      | 1.523(4)   |
| O7-Tb1-O5A  | 80.65(15)  | O2-Tb1-O5  | 85.83(13)  |
| O7-Tb1-O8A  | 86.04(17)  | O7-Tb1-O4  | 93.47(16)  |
| O5A-Tb1-O8A | 80.95(15)  | O5A-Tb1-O4 | 71.83(14)  |
| O7-Tb1-O1B  | 83.94(15)  | O8A-Tb1-O4 | 152.46(14) |
| O5A-Tb1-O1B | 156.91(13) | O1B-Tb1-O4 | 126.47(14) |
| O8A-Tb1-O1B | 80.92(15)  | O2-Tb1-O4  | 87.68(13)  |
| O7-Tb1-O2   | 155.20(14) | O5-Tb1-O4  | 58.52(14)  |
| O5A-Tb1-O2  | 122.90(14) | O7-Tb1-O1  | 145.25(14) |
| O8A-Tb1-O2  | 104.10(15) | O5A-Tb1-O1 | 69.39(13)  |
| O1B-Tb1-O2  | 75.60(14)  | O8A-Tb1-O1 | 72.54(14)  |
| O7-Tb1-O5   | 73.85(15)  | O1B-Tb1-O1 | 117.97(14) |
| O5A-Tb1-O5  | 121.44(15) | O2-Tb1-O1  | 59.13(13)  |
| O8A-Tb1-O5  | 145.63(15) | O5-Tb1-O1  | 137.11(12) |
| O1B-Tb1-O5  | 69.66(14)  | O4-Tb1-O1  | 93.52(13)  |

Symmetry codes: A: y, -x+y, z-1/6; B: x-y, x, z+1/6.

**Table S3.** Hydrogen bonds in **S-2C**.

| D-H...A        | d(D-H) | d(H...A) | d(D...A)  | <DHA (°) |
|----------------|--------|----------|-----------|----------|
| O10-H10C...O9  | 0.88   | 1.67     | 2.517(7)  | 160.3    |
| O1W-H1WA...O6  | 0.95   | 1.89     | 2.771(10) | 152.5    |
| O2W-H2WA...O3  | 0.95   | 1.98     | 2.790(7)  | 141.3    |
| O2W-H2WB...O2A | 0.95   | 2.18     | 2.868(6)  | 128.7    |
| N1-H1C...O3B   | 0.91   | 1.76     | 2.661(7)  | 171.1    |
| N1-H1D...O8A   | 0.91   | 2.29     | 3.163(7)  | 159.7    |
| N2-H2A...O4B   | 0.91   | 1.93     | 2.738(7)  | 147.6    |
| N2-H2B...O2W   | 0.91   | 2.03     | 2.919(7)  | 165.7    |
| N3-H3D...O9B   | 0.91   | 2.41     | 3.131(7)  | 136.5    |
| N3-H3E...O6    | 0.91   | 1.97     | 2.853(7)  | 162.2    |

Symmetry codes: A: y, -x+y, z-1/6; B: x-y, x, z+1/6.

**Table S4.** Selected bond lengths (Å) and bond angles (°) for **R-2C** at 193 K.

|             |            |            |            |
|-------------|------------|------------|------------|
| Tb1-O7      | 2.271(4)   | P1-O3      | 1.505(4)   |
| Tb1-O5A     | 2.313(4)   | P1-O2      | 1.522(4)   |
| Tb1-O8A     | 2.328(4)   | P1-O1      | 1.528(4)   |
| Tb1-O1B     | 2.347(4)   | P2-O6      | 1.497(4)   |
| Tb1-O2      | 2.413(3)   | P2-O5      | 1.525(4)   |
| Tb1-O4      | 2.465(3)   | P2-O4      | 1.527(4)   |
| Tb1-O5      | 2.466(4)   | P3-O9      | 1.512(4)   |
| Tb1-O1      | 2.518(4)   | P3-O8      | 1.519(4)   |
|             |            | P3-O7      | 1.520(4)   |
| O7-Tb1-O5A  | 80.43(13)  | O2-Tb1-O4  | 87.38(11)  |
| O7-Tb1-O8A  | 86.00(13)  | O7-Tb1-O5  | 73.90(13)  |
| O5A-Tb1-O8A | 81.07(13)  | O5A-Tb1-O5 | 121.17(13) |
| O7-Tb1-O1B  | 84.05(13)  | O8A-Tb1-O5 | 145.70(13) |
| O5A-Tb1-O1B | 156.80(10) | O1B-Tb1-O5 | 69.95(12)  |
| O8A-Tb1-O1B | 80.73(13)  | O2-Tb1-O5  | 85.89(11)  |
| O7-Tb1-O2   | 155.25(13) | O4-Tb1-O5  | 58.53(12)  |
| O5A-Tb1-O2  | 123.07(13) | O7-Tb1-O1  | 145.20(13) |
| O8A-Tb1-O2  | 104.04(12) | O5A-Tb1-O1 | 69.56(12)  |
| O1B-Tb1-O2  | 75.54(11)  | O8A-Tb1-O1 | 72.61(12)  |
| O7-Tb1-O4   | 93.86(13)  | O1B-Tb1-O1 | 117.87(12) |
| O5A-Tb1-O4  | 71.84(11)  | O2-Tb1-O1  | 59.13(12)  |
| O8A-Tb1-O4  | 152.51(12) | O4-Tb1-O1  | 93.16(11)  |
| O1B-Tb1-O4  | 126.65(13) | O5-Tb1-O1  | 137.04(10) |

Symmetry codes: A:  $y, -x+y+1, z+1/6$ ; B:  $x-y+1, x, z-1/6$ .

**Table S5.** Hydrogen bonds in **R-2C**.

| D-H...A        | d(D-H) | d(H...A) | d(D...A) | <DHA (°) |
|----------------|--------|----------|----------|----------|
| O10-H10C...O9  | 0.88   | 1.64     | 2.511(6) | 167.3    |
| O1W-H1WA...O6  | 0.95   | 1.86     | 2.775(9) | 160.3    |
| O2W-H2WA...O3  | 0.95   | 2.31     | 2.786(5) | 110.4    |
| O2W-H2WB...O2A | 0.96   | 1.96     | 2.869(5) | 156.7    |
| N1-H1D...O3B   | 0.91   | 1.75     | 2.657(6) | 171.8    |
| N1-H1C...O8A   | 0.91   | 2.28     | 3.147(5) | 158.9    |
| N2-H2A...O2W   | 0.91   | 2.02     | 2.910(6) | 165.0    |
| N2-H2B...O4B   | 0.91   | 1.92     | 2.732(6) | 148.4    |
| N3-H3D...O6    | 0.91   | 1.96     | 2.838(6) | 161.6    |
| N3-H3E...O9B   | 0.91   | 2.40     | 3.120(6) | 136.1    |

Symmetry transformations used to generate equivalent atoms:

A:  $y, -x+y+1, z+1/6$ ; B:  $x-y+1, x, z-1/6$ .

**Table S6** Structural comparison of  $\text{Tb}(\text{R-cyampH})_3 \cdot \text{HOAc} \cdot 2\text{H}_2\text{O}$ ,  $\text{Tb}(\text{R-pempH})_3 \cdot \text{H}_2\text{O}$  and  $[\text{Tb}_3(\text{R-pempH}_2)_2(\text{R-pempH})_7](\text{NO}_3)_2 \cdot 2\text{H}_2\text{O}$ .

| Compounds                     | <b><math>\text{Tb}(\text{R-cyampH})_3 \cdot \text{HOAc} \cdot 2\text{H}_2\text{O}</math></b><br>(this work)                                                                 | <b><math>\text{Tb}(\text{R-pempH})_3 \cdot \text{H}_2\text{O}</math></b><br>(Nat. Commun. 2017, 8, 2131)                                                                      | <b><math>[\text{Tb}_3(\text{R-pempH}_2)_2(\text{R-pempH})_7]</math><br/><b><math>(\text{NO}_3)_2 \cdot 2\text{H}_2\text{O}</math></b></b><br>(Nat. Commun. 2017, 8, 2131)                                                |
|-------------------------------|-----------------------------------------------------------------------------------------------------------------------------------------------------------------------------|-------------------------------------------------------------------------------------------------------------------------------------------------------------------------------|--------------------------------------------------------------------------------------------------------------------------------------------------------------------------------------------------------------------------|
| Different ligands             | 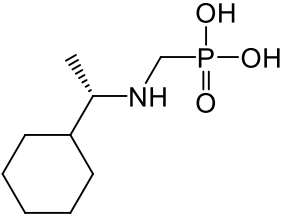 <p>Terminal organic part: cyclohexyl</p>                                                  |  <p>Terminal organic part: phenyl</p>                                                      |                                                                                                                                                                                                                          |
| Similar coordination geometry |  <p>{Tb1O<sub>8</sub>}</p> <p>Tb-O: 2.279(4)–2.518(4) Å<br/>O-Tb-O: 58.5(1)–156.9(1)°</p> |  <p>{Tb1O<sub>8</sub>}</p> <p>Tb-O: 2.28(2)–2.632(16) Å<br/>O-Tb-O: 58.1(5)–162.2(5)°</p> |  <p>{Tb1O<sub>7</sub>}, {Tb2O<sub>8</sub>} and {Tb3O<sub>8</sub>}</p> <p>Tb-O: 2.253(7)–2.563(7) Å<br/>O-Tb-O: 57.8(1)–159.1(1)°</p> |

Helical chains

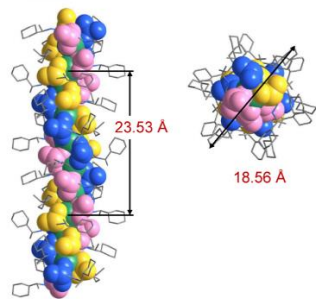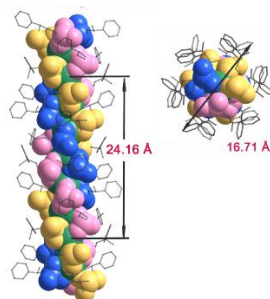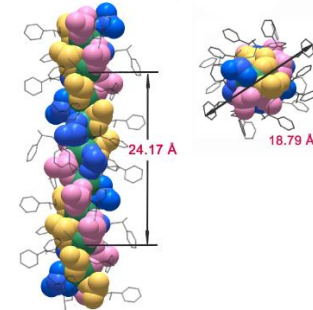

Intrachain H-bonds involving -NH<sub>2</sub>- groups

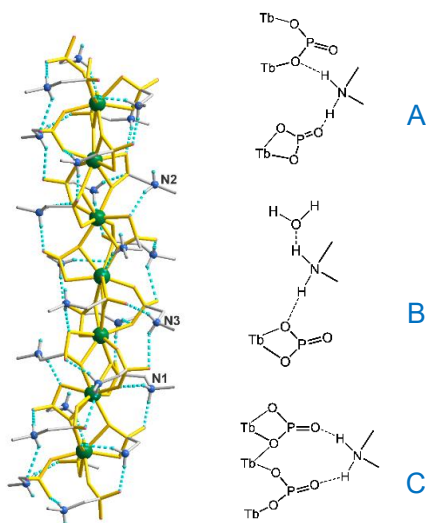

three modes: A, B and C

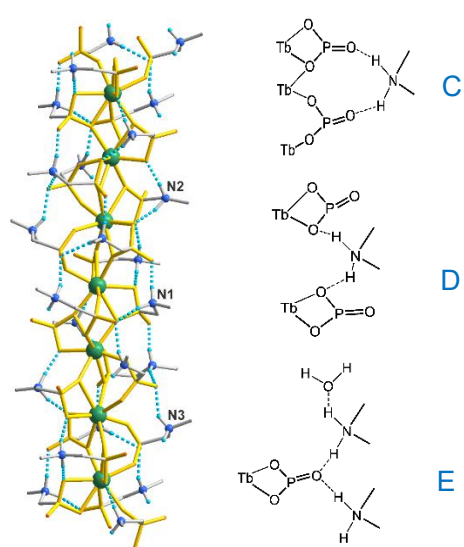

three modes: C, D and E

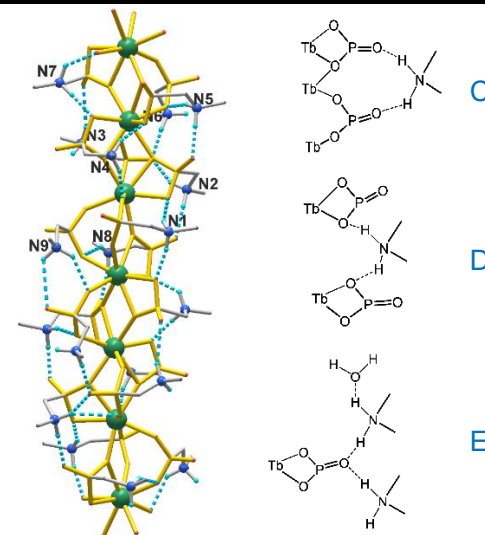

|                                                               |                                                                                                                                            |                                                                                    |                                                                                                                                   |
|---------------------------------------------------------------|--------------------------------------------------------------------------------------------------------------------------------------------|------------------------------------------------------------------------------------|-----------------------------------------------------------------------------------------------------------------------------------|
|                                                               |                                                                                                                                            |                                                                                    | 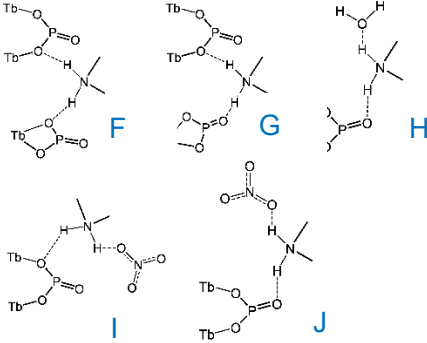 <p>Eight modes: C, D, E, F, G, H, I and J</p> |
| <p>H-bonds involving<br/>-lattice molecules<br/>or anions</p> |  <p>H-bonds between one chain and<br/>HOAc molecules</p> |  |                                               |

|                         |                                                                                                                       |                                                                                                                                                                                               |                                                                                                     |
|-------------------------|-----------------------------------------------------------------------------------------------------------------------|-----------------------------------------------------------------------------------------------------------------------------------------------------------------------------------------------|-----------------------------------------------------------------------------------------------------|
|                         |                                                                                                                       |                                                                                                                                                                                               | <p>H-bonds between two chains and NO<sub>3</sub><sup>-</sup> molecules</p>                          |
| Interchain interactions | <p>only vdW interactions</p> <p>short C...C distances between two chains<br/>3.78(1), 3.80(2), 3.77(1), 3.76(2) Å</p> | <p>vdW and C-H...π interactions</p> <p>short C...C distances between two chains<br/>3.54(1), 3.58(1), 3.80(1) Å</p> <p>C...Cgs distances (C-H...π)<br/>3.69(1) Å (methyl C...phenyl ring)</p> | <p>only vdW interactions</p> <p>short C...C distances between two chains<br/>3.62(1), 3.77(1) Å</p> |
| Interchain distance     | 17.031 Å                                                                                                              | 15.824 Å                                                                                                                                                                                      | 15.342 Å, 16.987 Å                                                                                  |



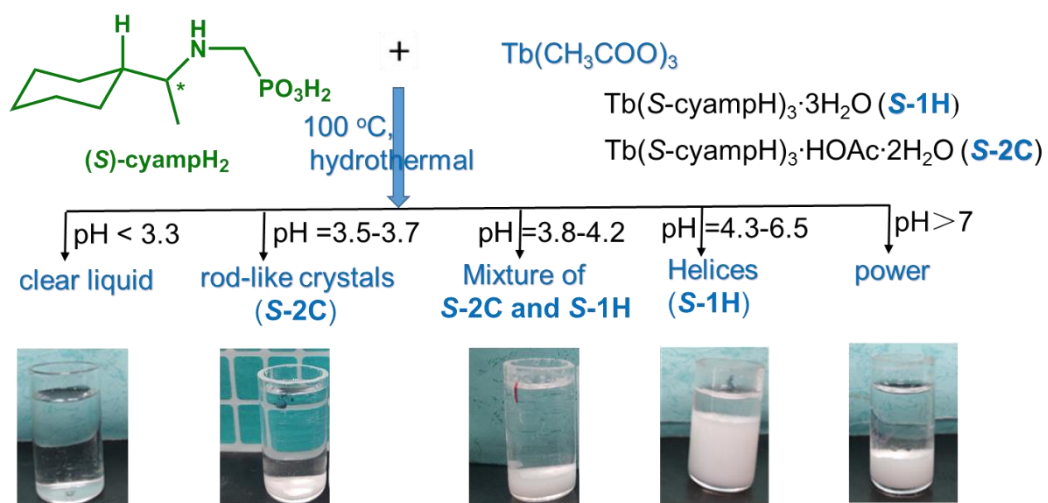

**Figure S1.** Summary of pH regulation results of S-cyampH<sub>2</sub> / Tb(OAc)<sub>3</sub>.

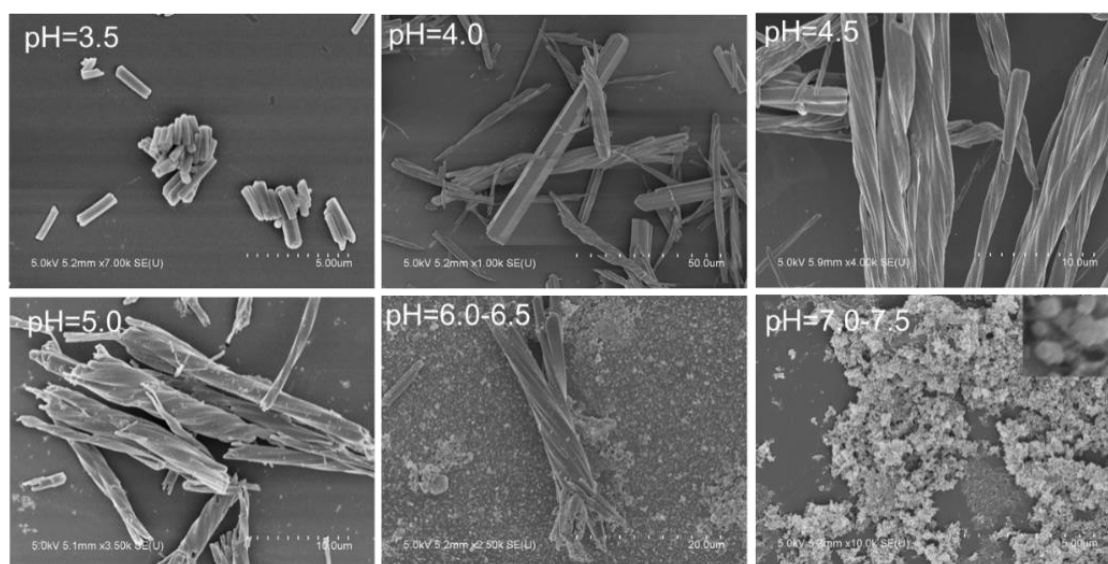

**Figure S2.** SEM images of the reaction products of Tb(OAc)<sub>3</sub> and S-cyampH<sub>2</sub> at 100 °C and 24 h for different pH values.

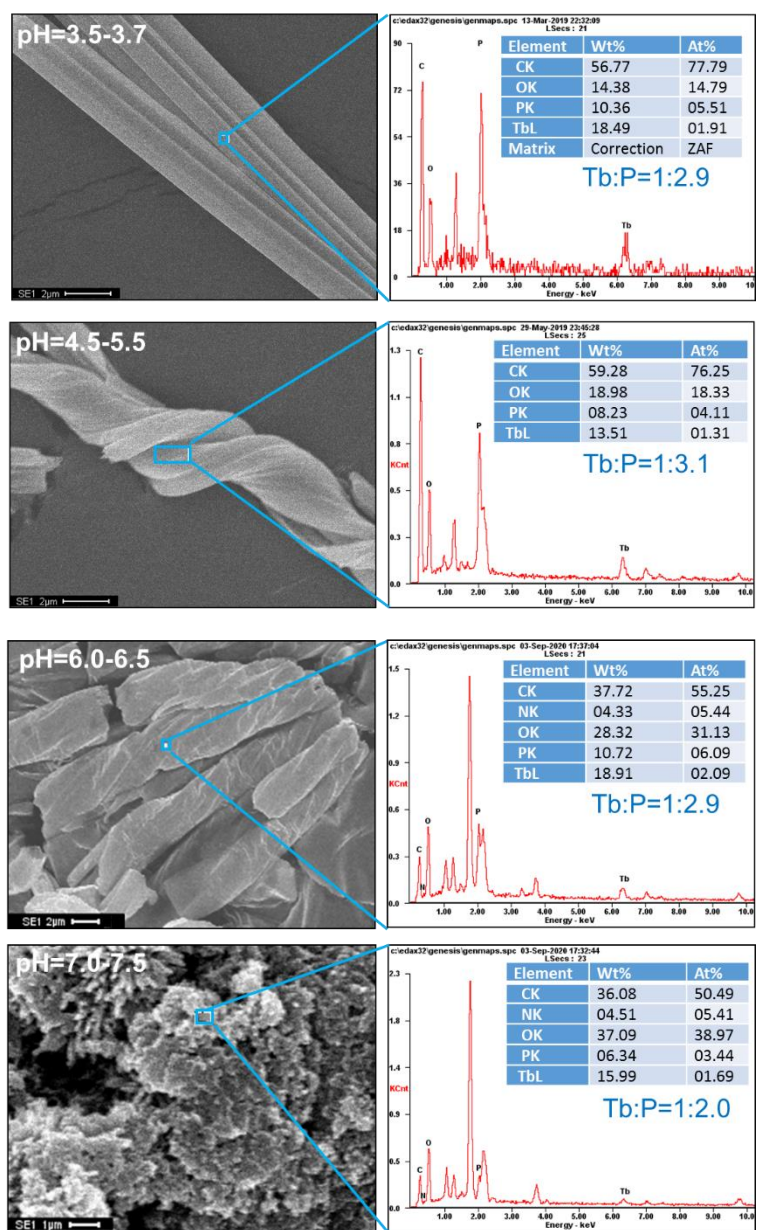

**Figure S3.** EDX images of the reaction products of  $\text{Tb}(\text{OAc})_3$  and  $\text{S-cyampH}_2$  at  $100\text{ }^\circ\text{C}$  and 24 h for different pH values.

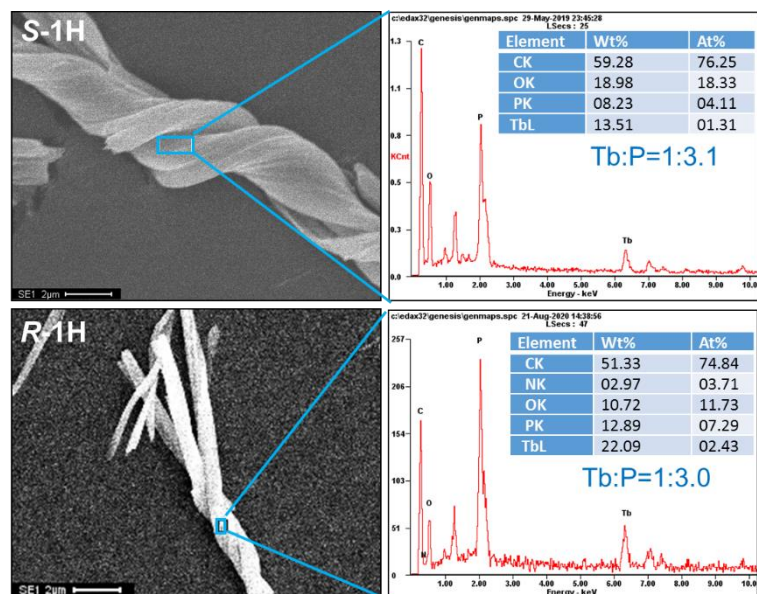

**Figure S4.** EDX spectra of **S-1H** and **R-1H** helices.

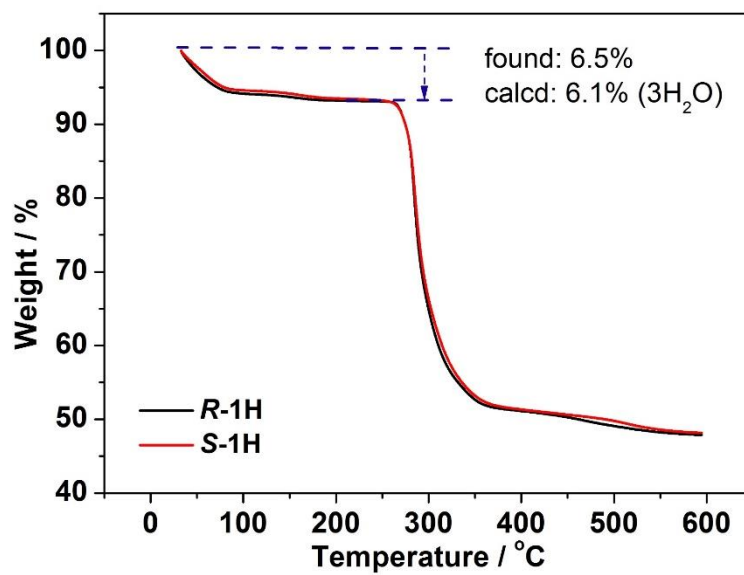

**Figure S5.** TG analyses of **S-1H** and **R-1H**.

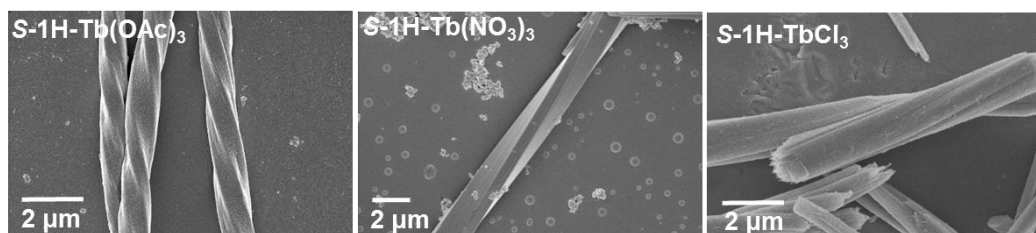

**Figure S6.** SEM images of **S-1H** obtained under similar hydrothermal reaction conditions (pH = 4.5, 100 °C, 24 h) except using different terbium salt.

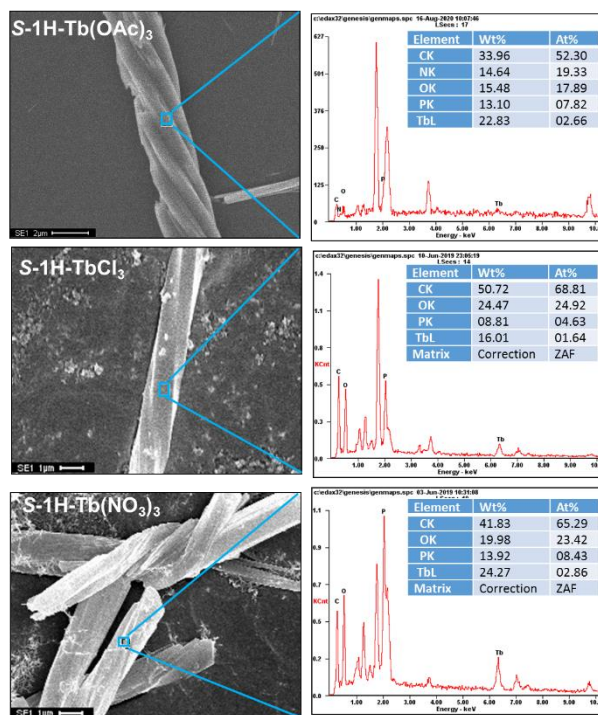

**Figure S7.** EDX spectra of **S-1H** obtained under similar hydrothermal reaction conditions (pH = 4.5, 100 °C, 24 h) except using different terbium salt.

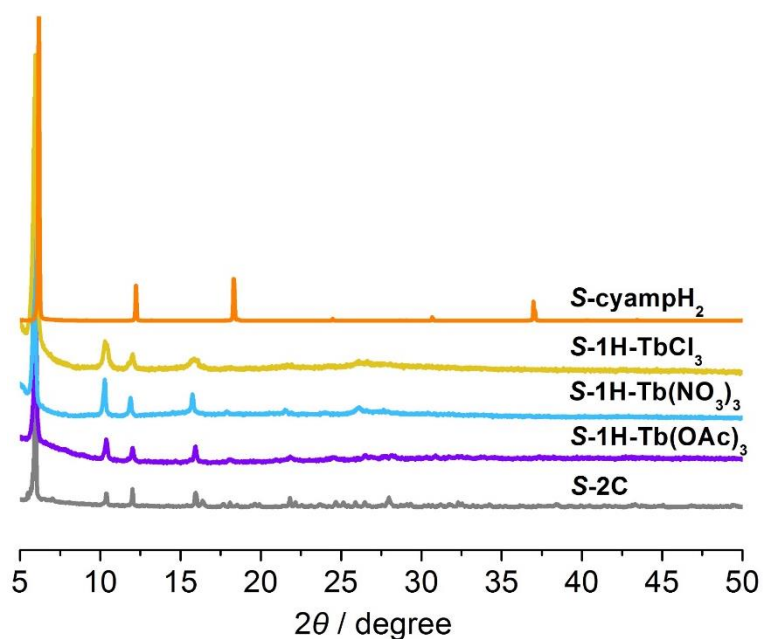

**Figure S8.** PXRD patterns of **S-1H** obtained under similar hydrothermal reaction conditions (pH = 4.5, 100 °C, 24 h) except using different terbium salt.

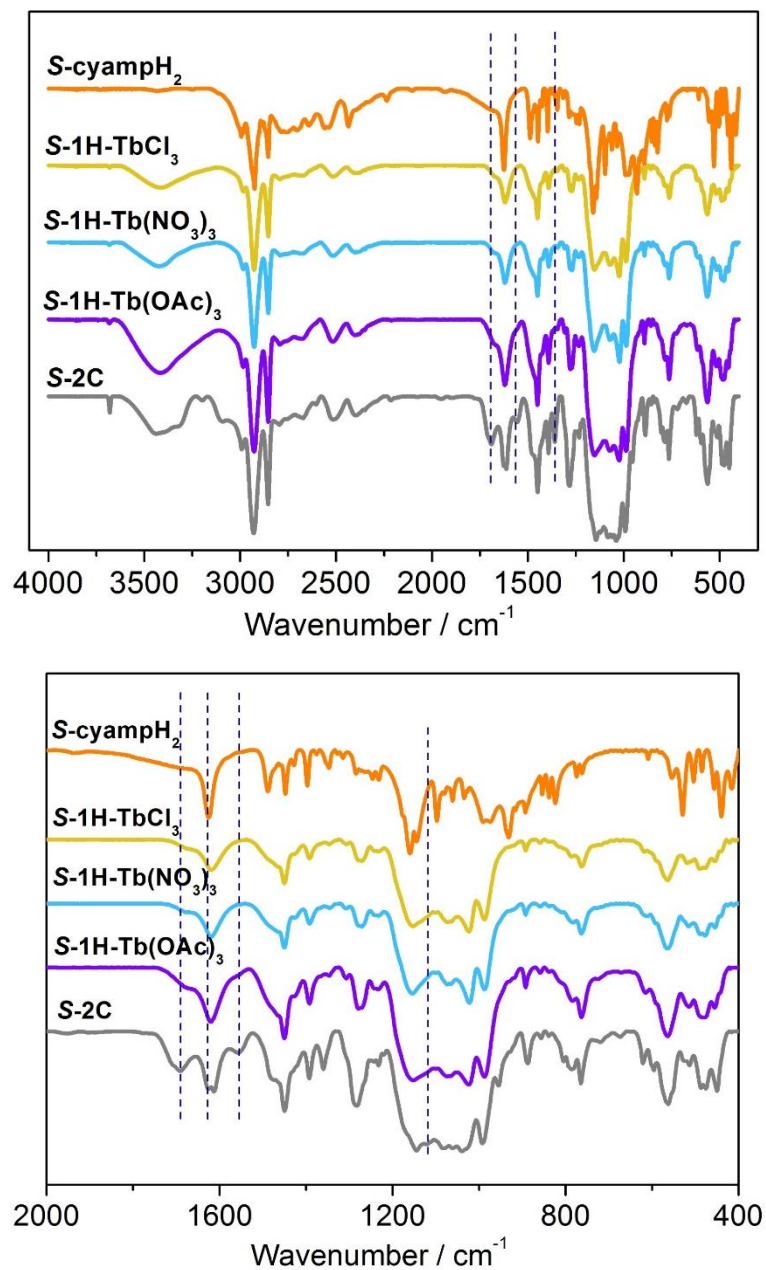

**Figure S9.** Infrared spectra (IR) of **S-1H** obtained under similar hydrothermal reaction conditions (pH = 4.5, 100 °C, 24 h) except using different terbium salt.

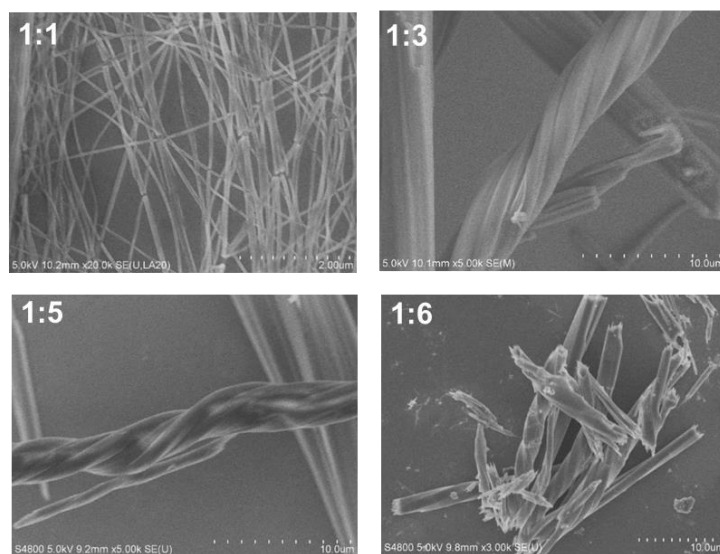

**Figure S10.** SEM images of products obtained under similar hydrothermal reaction conditions (pH = 4.5, 100 °C, 24 h) except using different Tb/P molar ratio.

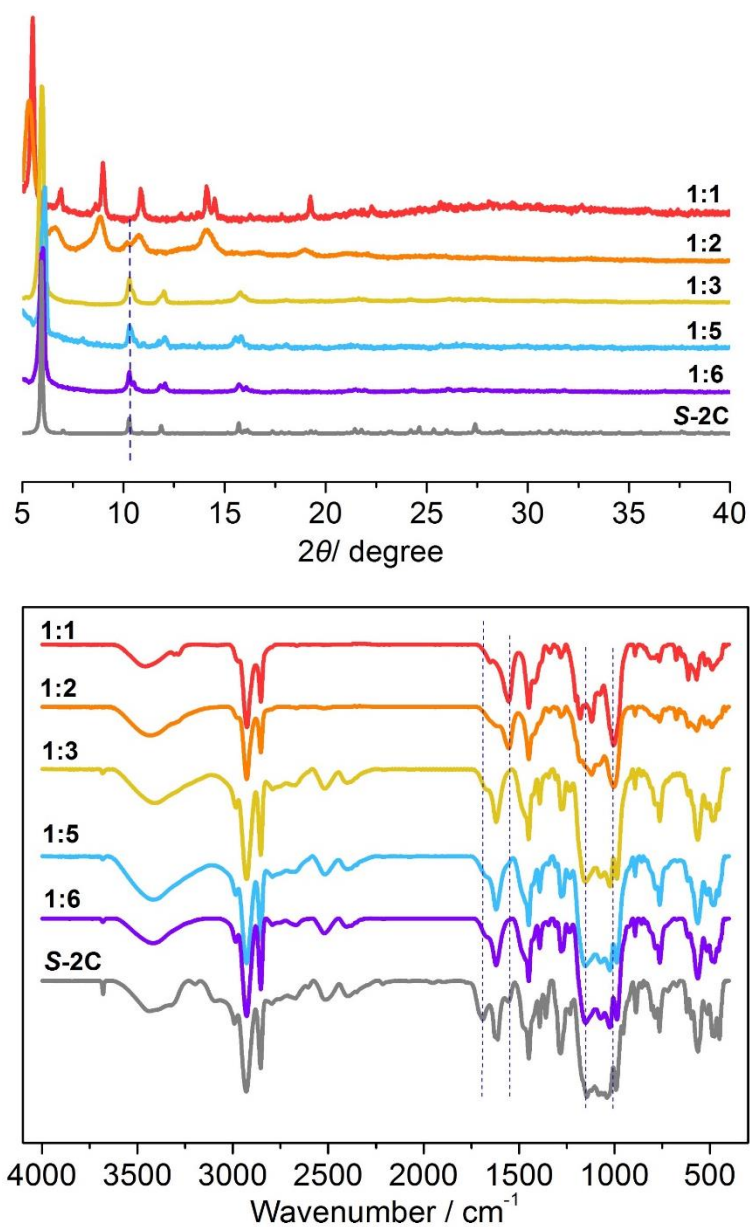

**Figure S11.** PXRD patterns (top) and infrared spectra (bottom) of products obtained under similar hydrothermal reaction conditions (pH = 4.5, 100 °C, 24 h) except using different Tb/P molar ratio.

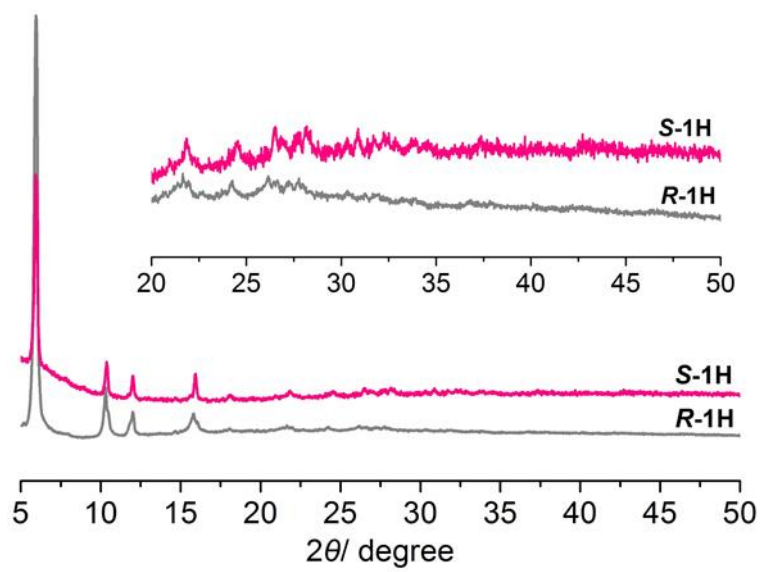

**Figure S12.** PXRD patterns of **S-1H** and **R-1H**.



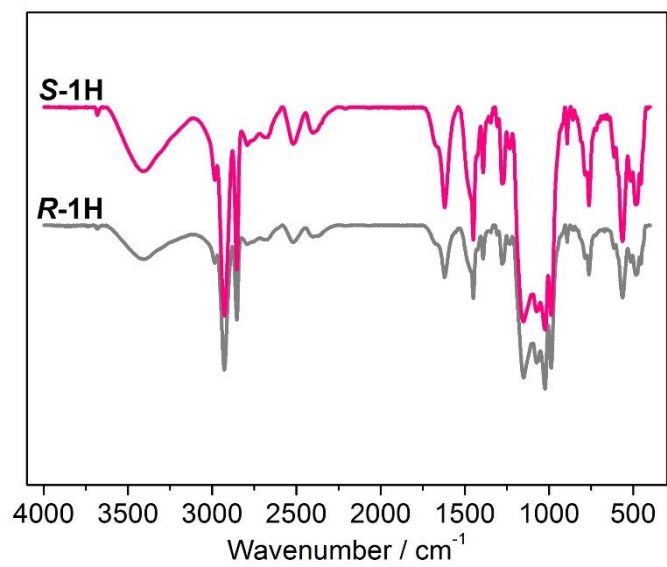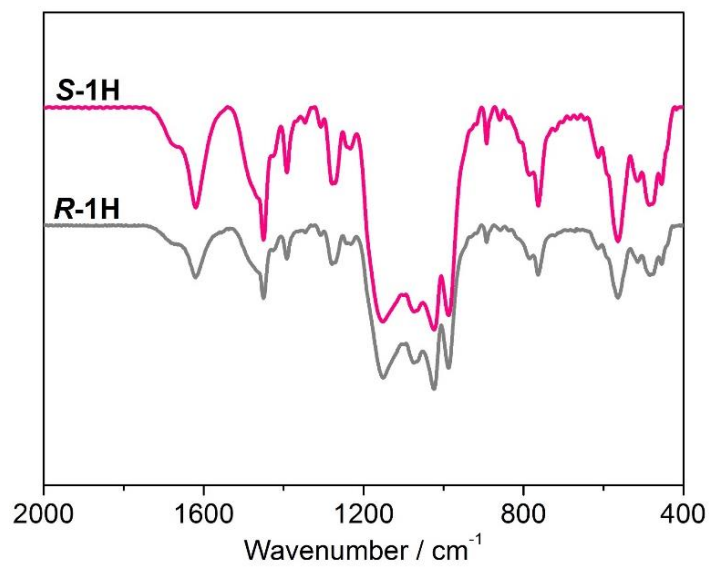

**Figure S13.** Infrared spectra of **S-1H** and **R-1H**.

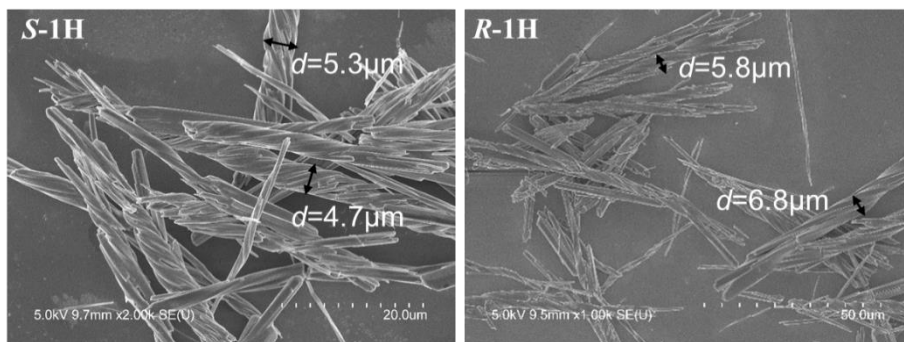

**Figure S14.** SEM images of **S-1H** and **R-1H**.

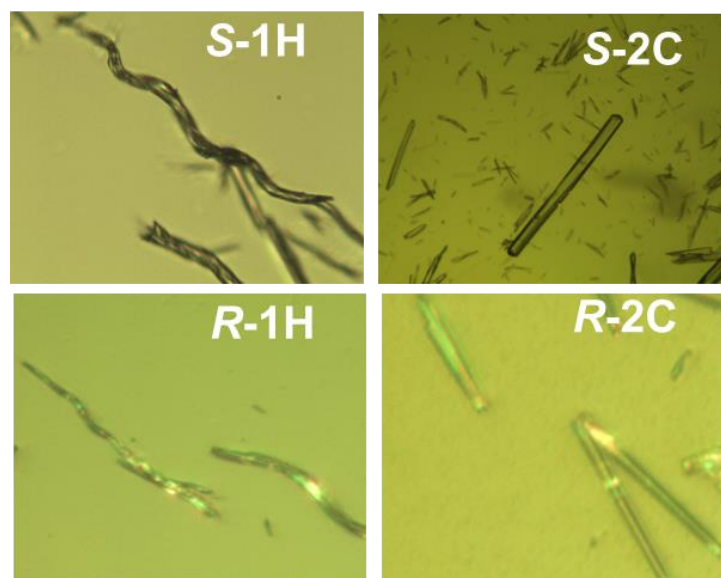

**Figure S15.** Optical photographs of **S-1H**, **R-1H**, **S-2C**, and **R-2C**.

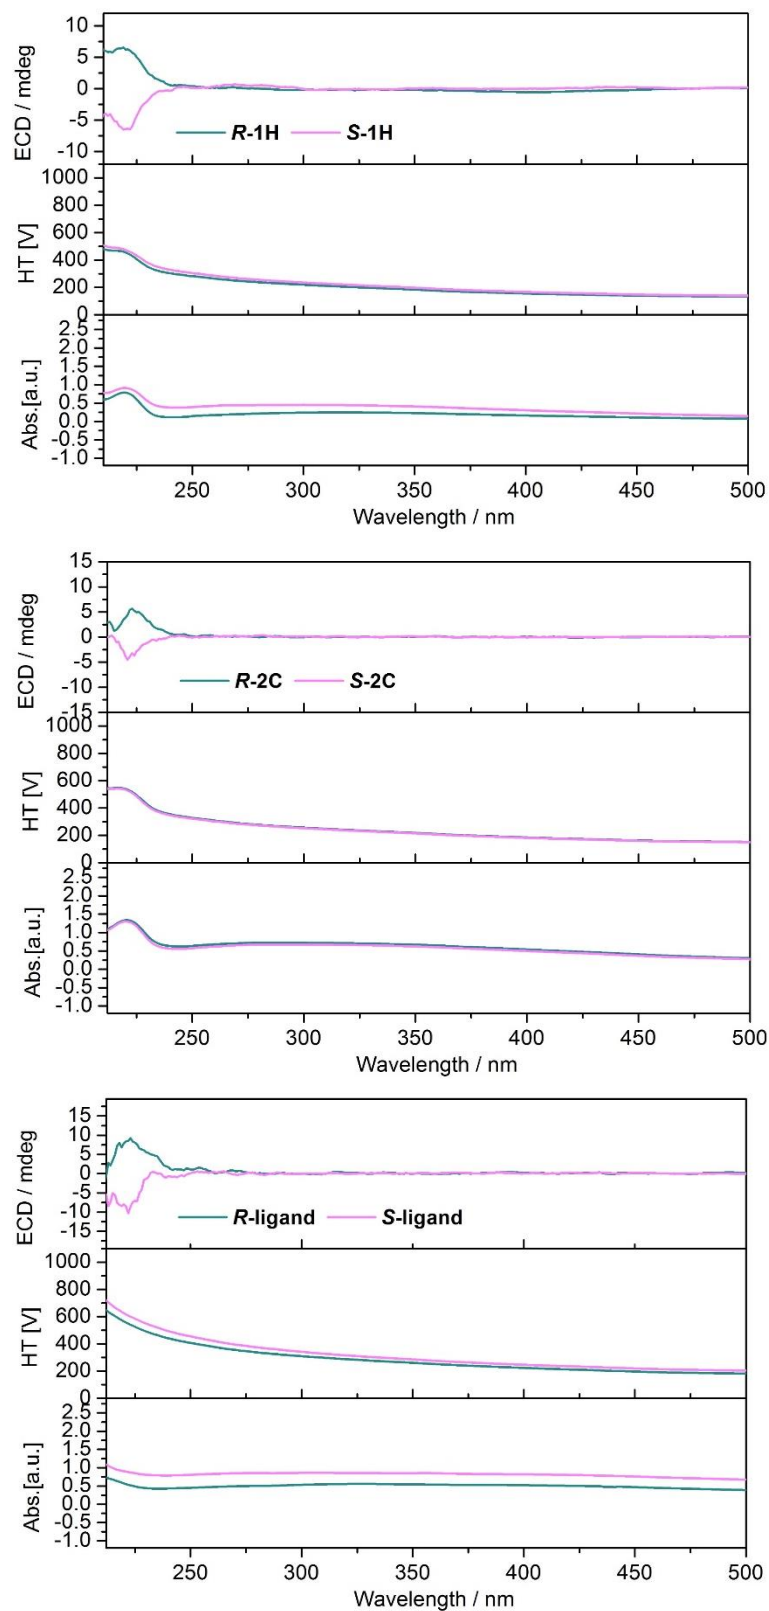

**Figure S16.** ECD spectra of S- and R-isomers of **1H** superhelices, **2C** crystals and cyampH<sub>2</sub> ligands.

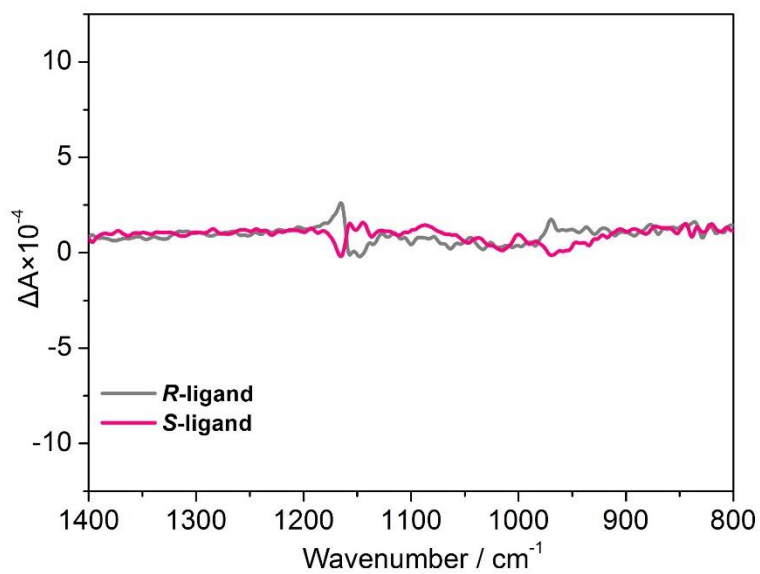

**Figure S17.** VCD spectra of S- and R-cyampH<sub>2</sub> ligands.

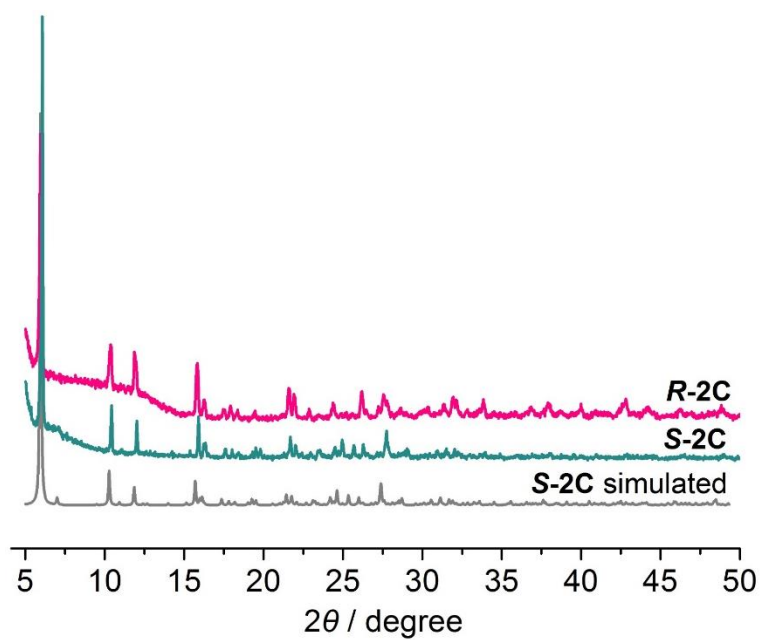

**Figure S18.** PXRD patterns of S-2C and R-2C

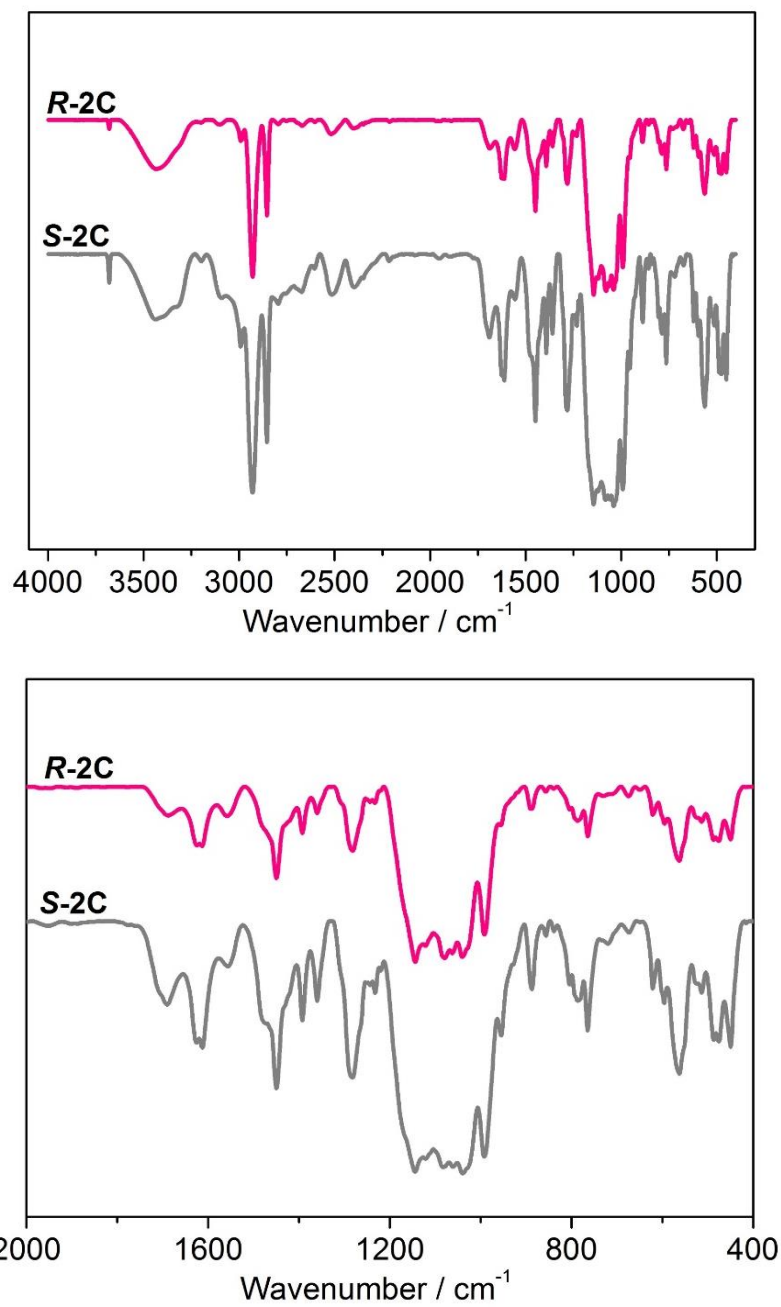

**Figure S19.** Infrared spectra of **S-2C** and **R-2C**.

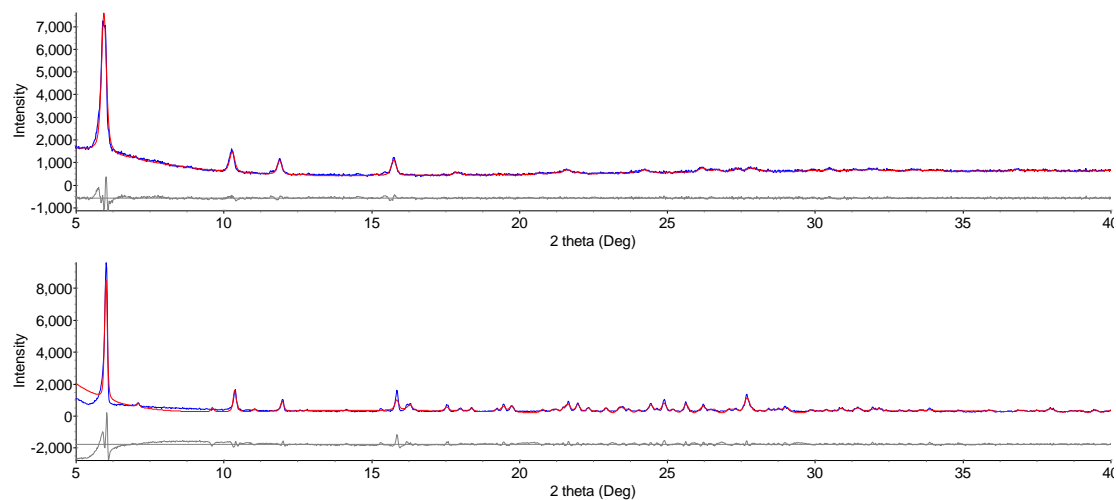

**Figure S20.** Pawley fit of powder samples of **S-1H** (top) and **S-2C** (bottom) using Topas 5.0 program

The diffraction peaks can be indexed by using TOPAS 5.0 program, giving a set of unit cell parameters with space group  $P6_1$ ,  $a = 17.21 \text{ \AA}$ ,  $c = 23.77 \text{ \AA}$  and  $V = 6094.30 \text{ \AA}^3$  for **S-1H** (Figure S20, top). And the diffraction peaks of **S-2C** can also be simulated to get a set of unit cell parameters with space group,  $a = 17.13 \text{ \AA}$ ,  $c = 23.67 \text{ \AA}$  and  $V = 6016.89 \text{ \AA}^3$  for **S-2C** (Figure S20, bottom).

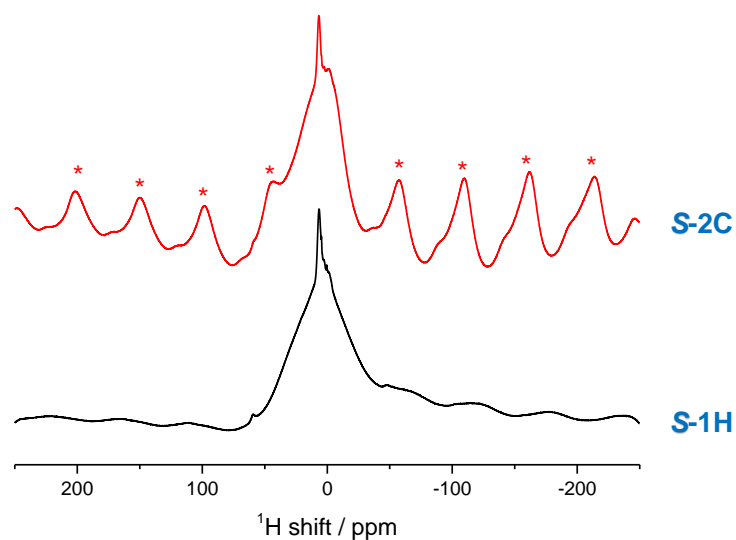

**Figure S21.**  $^1\text{H}$  MAS NMR of **S-1H** and **S-2C**. Asterisks denote spinning sidebands.

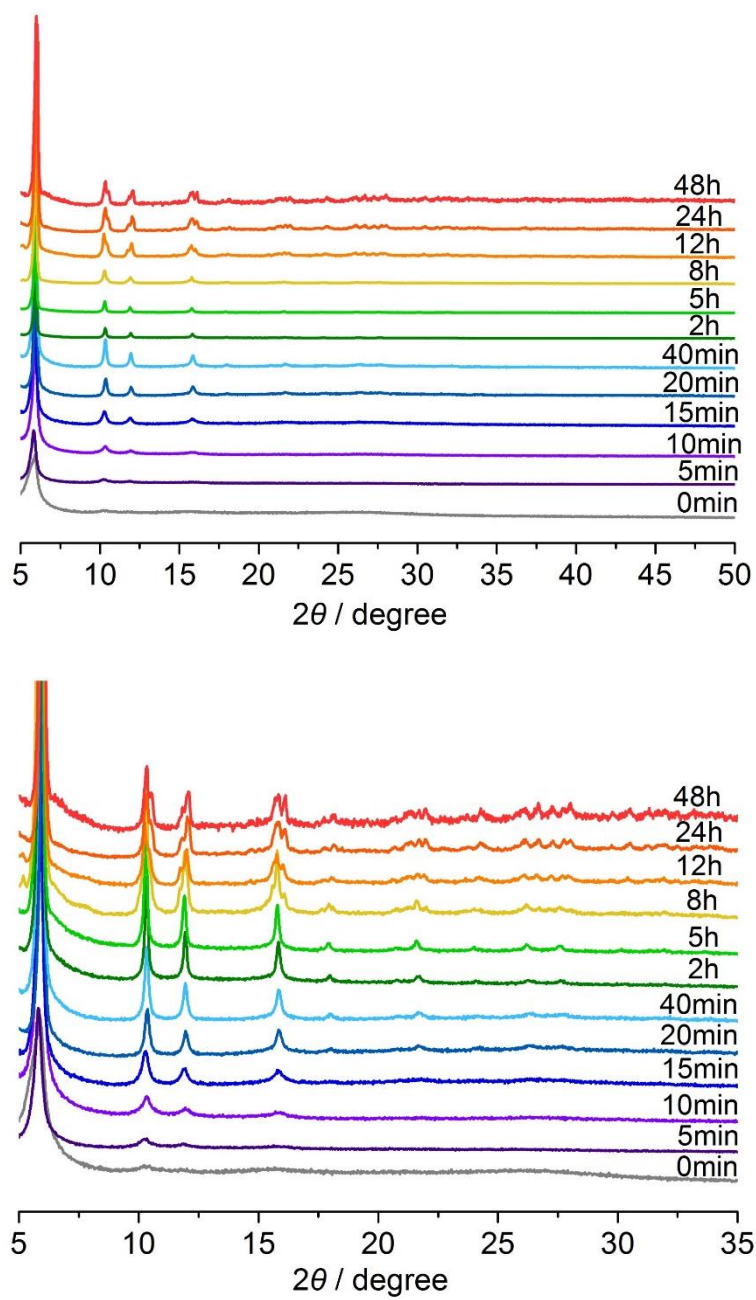

**Figure S22.** PXRD patterns of the products after hydrothermal reactions of  $\text{Tb}(\text{OAc})_3$  and S-cyampH<sub>2</sub> at pH 4.5 and 100 °C for different period of time.

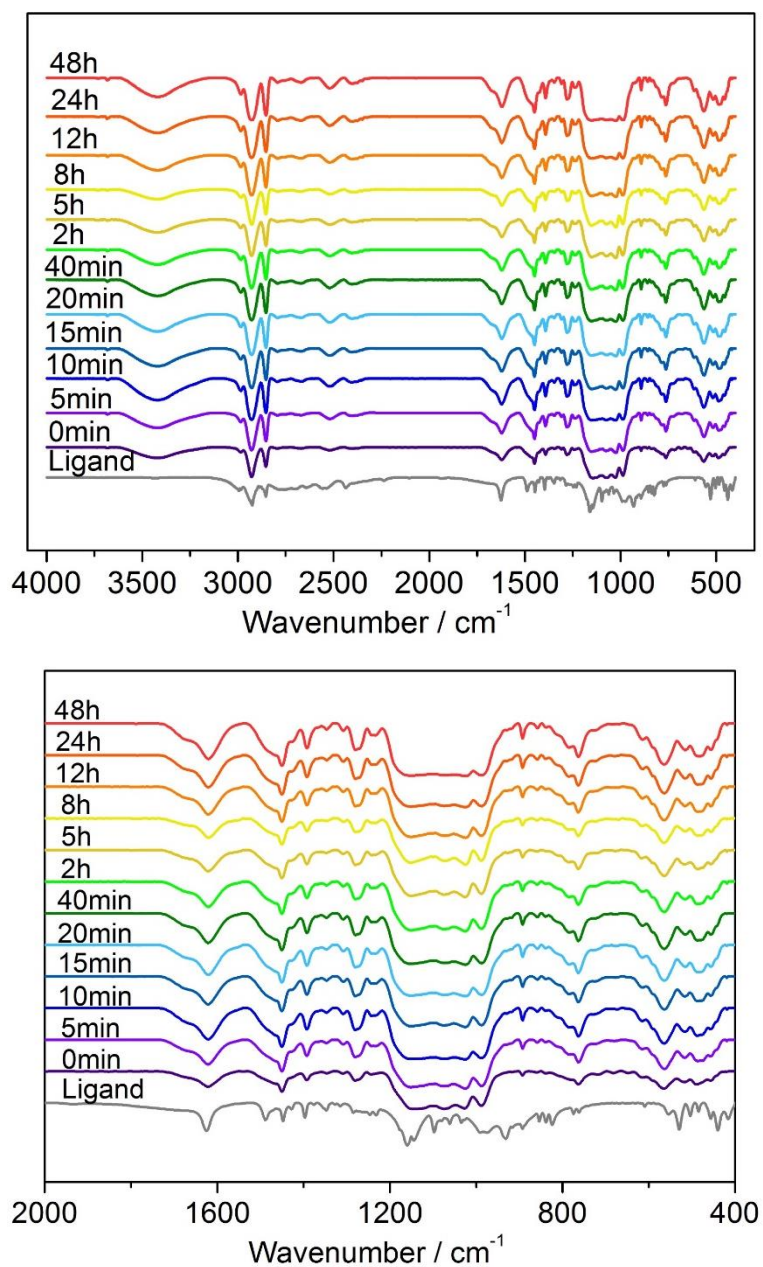

**Figure S23.** Infrared spectra of the products after hydrothermal reactions of  $\text{Tb}(\text{OAc})_3$  and  $\text{S-cyampH}_2$  at pH 4.5 and 100 °C for different period of time.



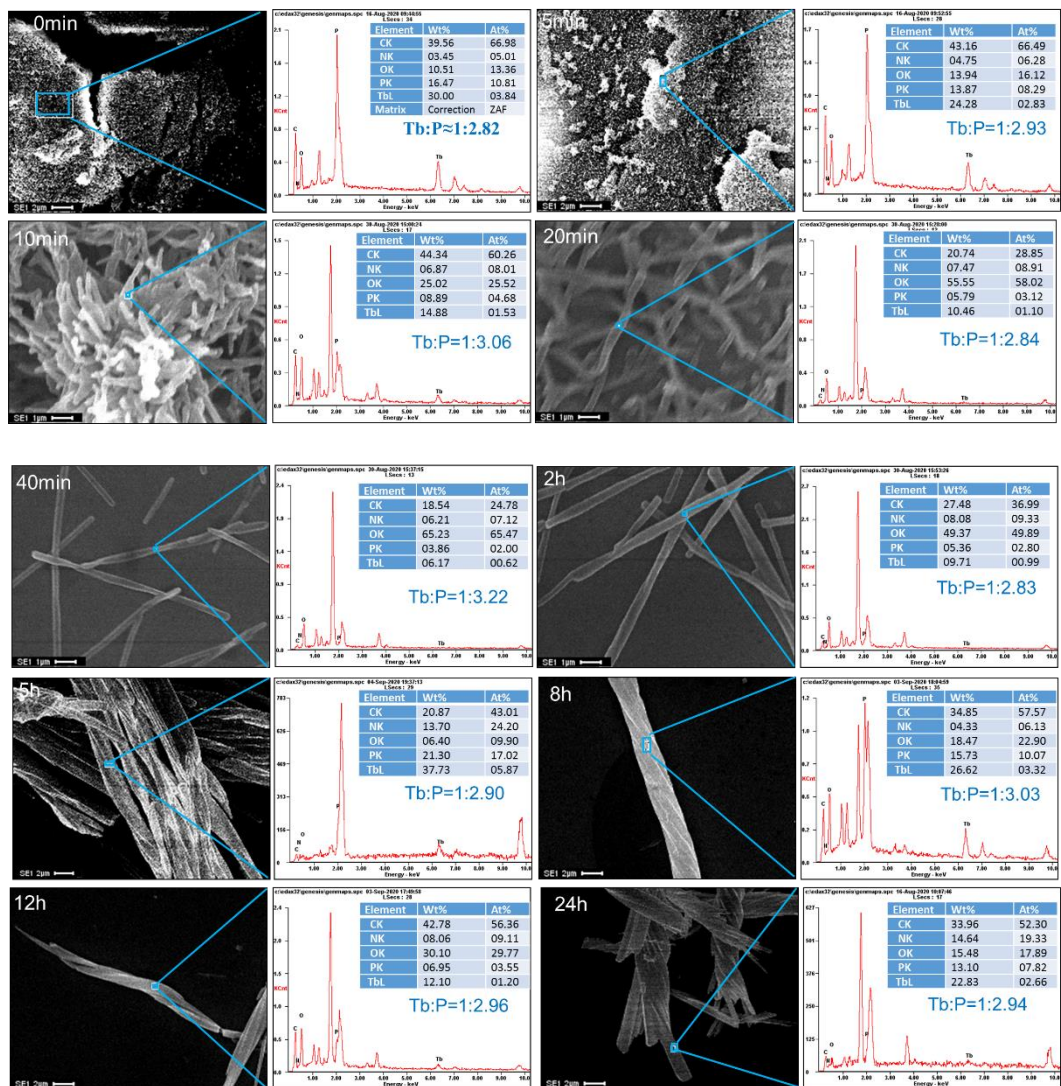

**Figure S24.** EDX spectra of the products after hydrothermal reactions of  $Tb(OAc)_3$  and S-cyampH<sub>2</sub> at pH 4.5 and 100 °C for different period of time.

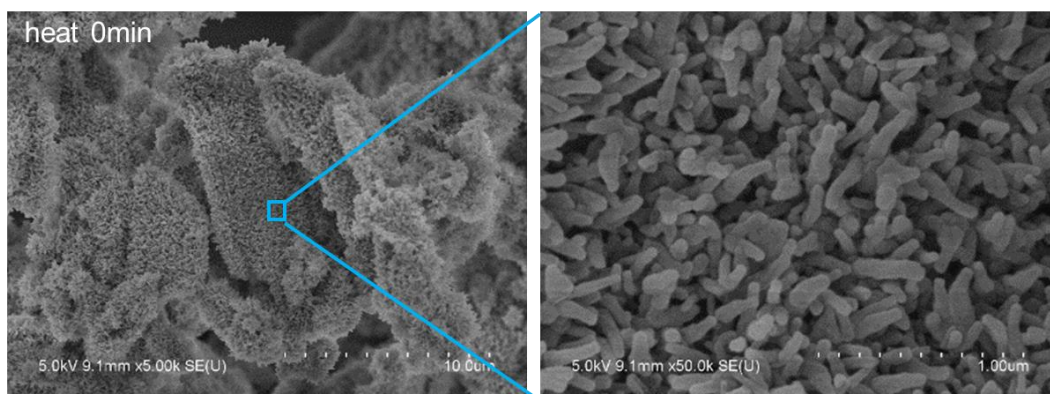

**Figure S25.** SEM images of the products after mixing aqueous solutions of  $Tb(OAc)_3$  and S-cyampH<sub>2</sub> at pH 4.5.

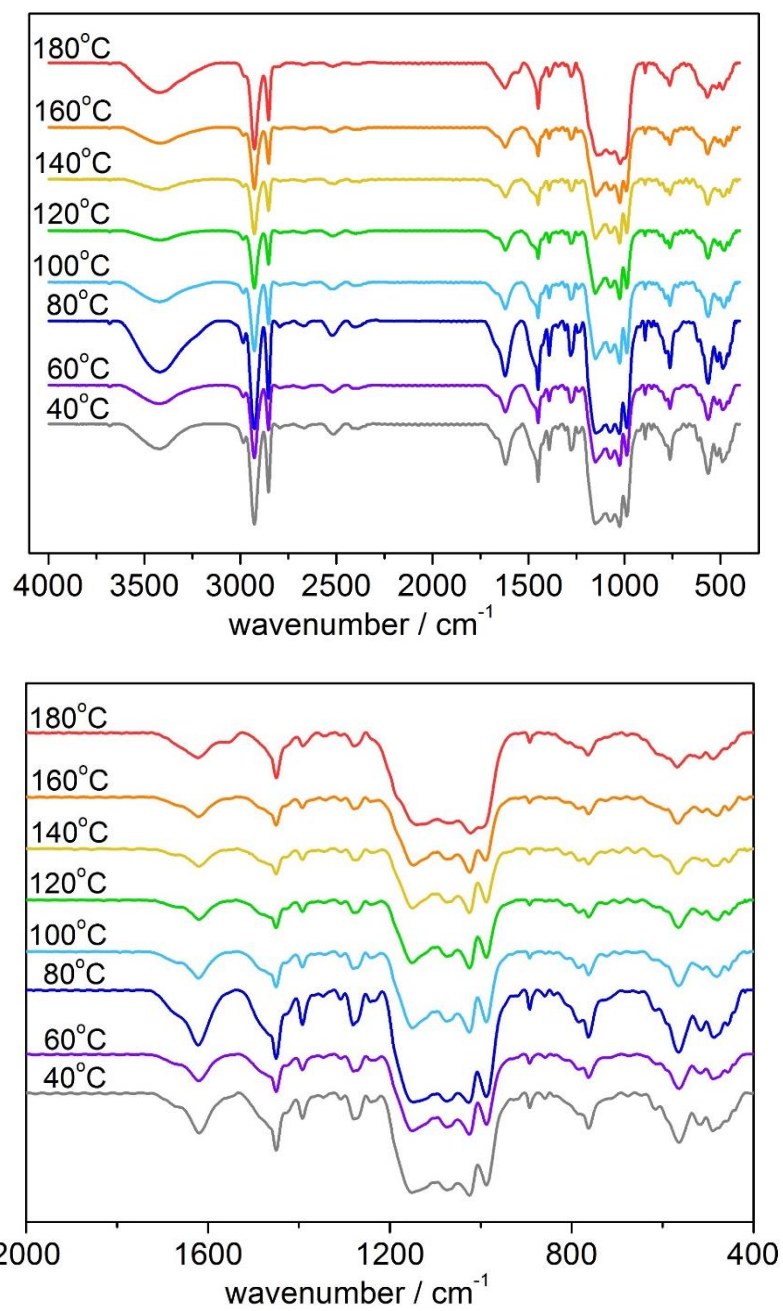

**Figure S26.** Infrared spectra of the products after hydrothermal reactions of  $\text{Tb}(\text{OAc})_3$  and  $\text{S-cyampH}_2$  at pH 4.5 and different reaction temperature (40-180  $^\circ\text{C}$ ) for 24 h.

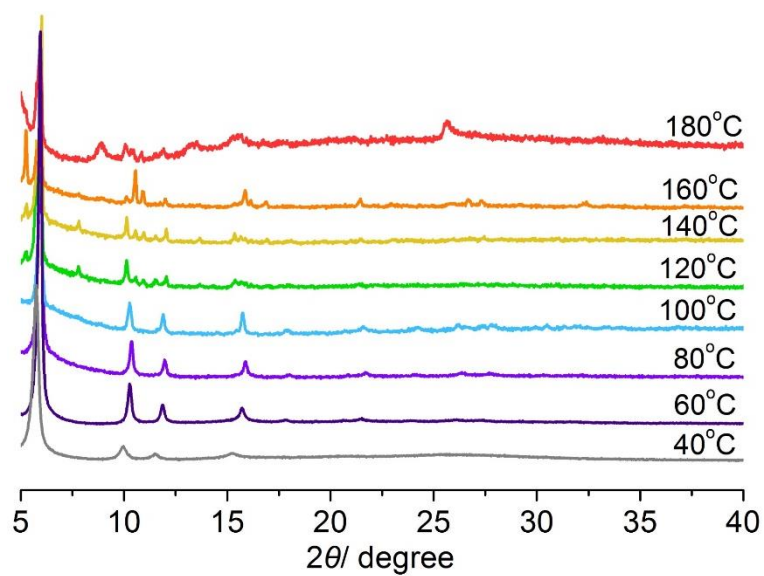

**Figure S27.** PXRD patterns of the products after hydrothermal reactions of  $\text{Tb}(\text{OAc})_3$  and  $\text{S-cyampH}_2$  at pH 4.5 and different reaction temperature (40-180 °C) for 24 h.

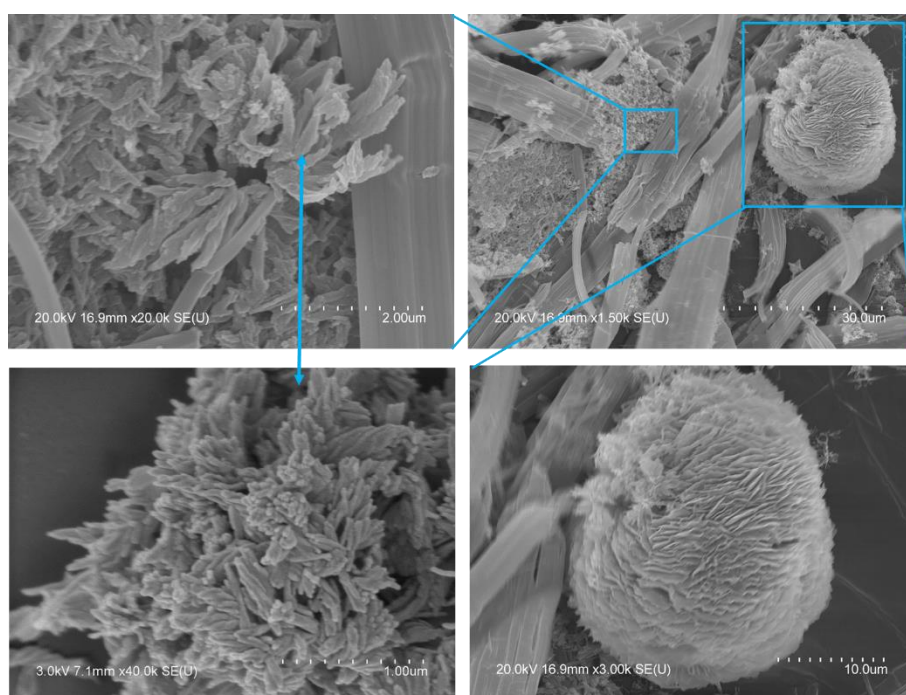

**Figure S28.** SEM images of the product after hydrothermal reaction of  $\text{Tb}(\text{OAc})_3$  and  $\text{S-cyampH}_2$  at pH 4.5 and 160 °C for 24 h.

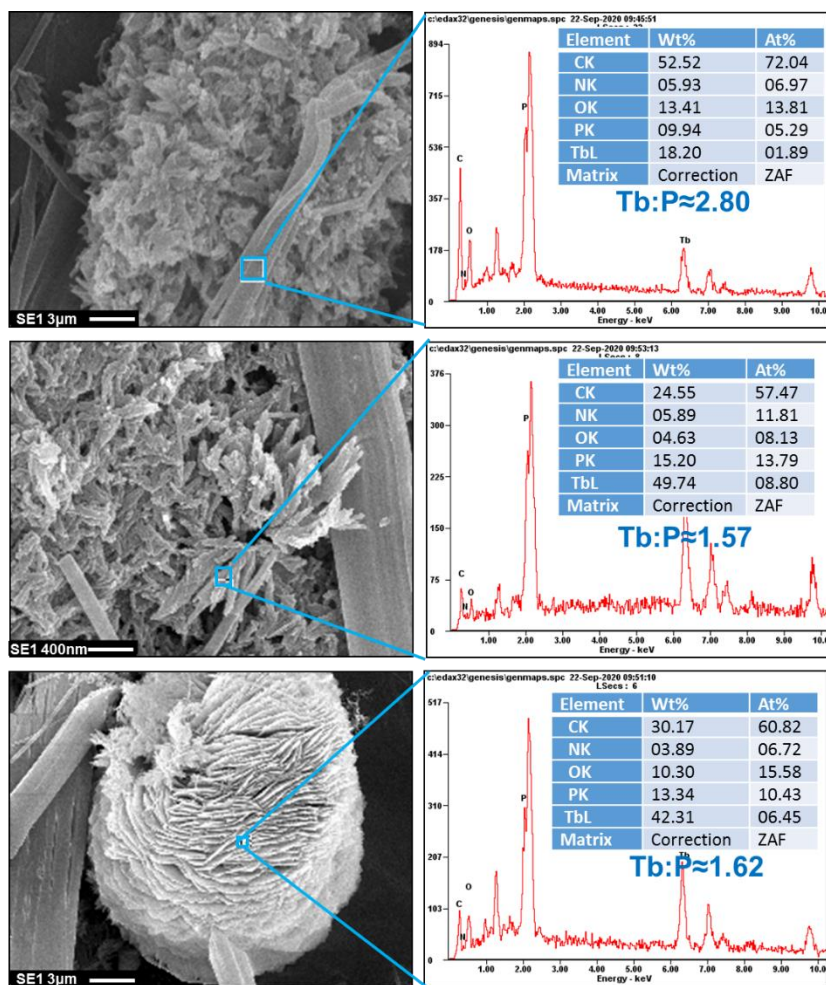

**Figure S29.** The EDX spectra of the product after hydrothermal reaction of  $\text{Tb}(\text{OAc})_3$  and  $\text{S-cyampH}_2$  at pH 4.5 and 160 °C for 24 h.

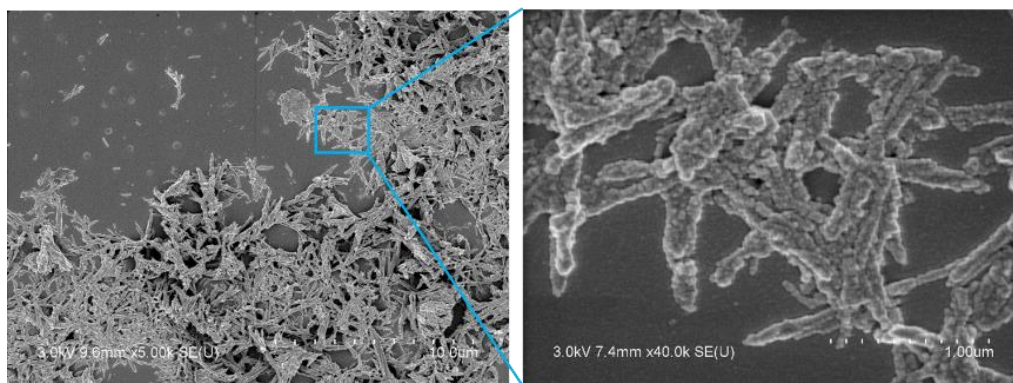

**Figure S30.** SEM images of the product after hydrothermal reaction of  $Tb(OAc)_3$  and S-cyampH<sub>2</sub> at pH 4.5 and 180 °C for 24 h.

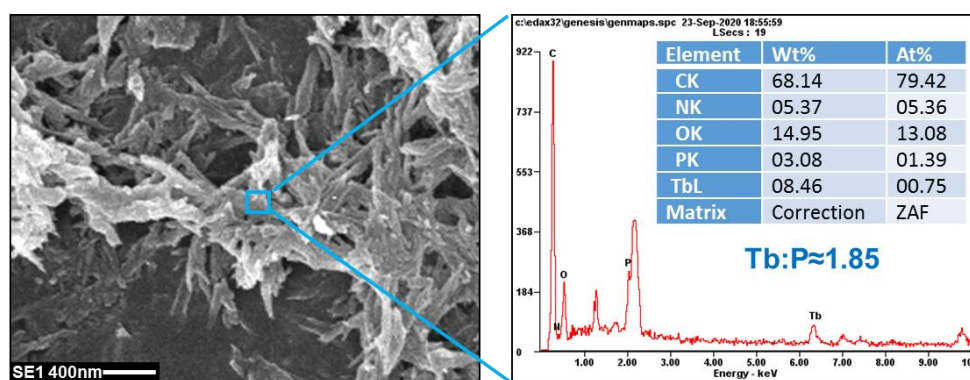

**Figure S31.** The EDX spectra of the product after hydrothermal reaction of  $Tb(OAc)_3$  and S-cyampH<sub>2</sub> at pH 4.5 and 180 °C for 24 h.

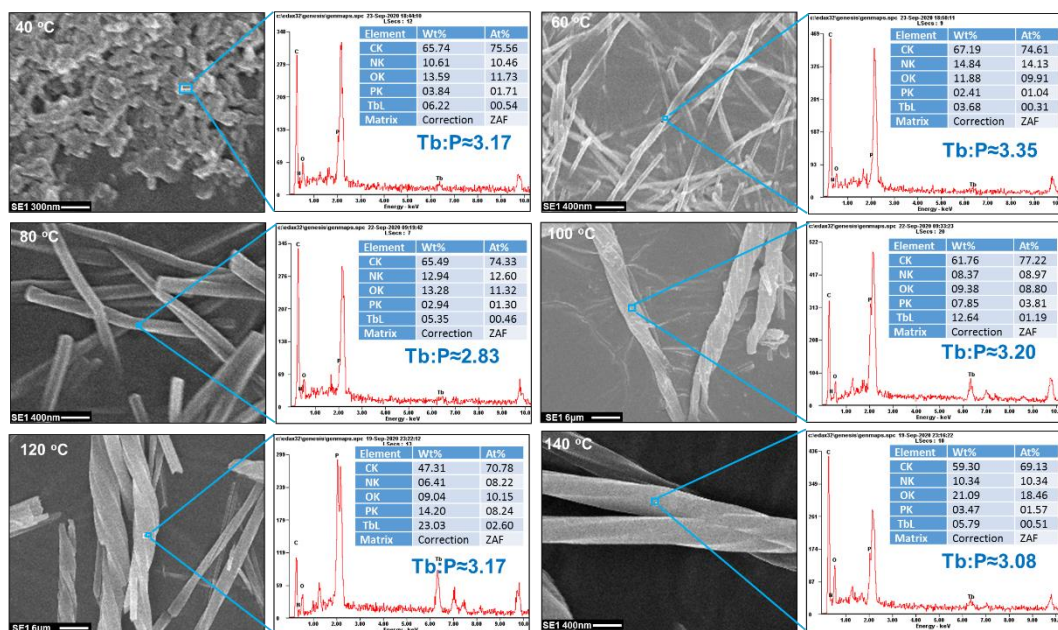

**Figure S32.** The EDX spectra of the product after hydrothermal reaction of  $\text{Tb}(\text{OAc})_3$  and *S*-cyampH<sub>2</sub> at pH 4.5 and different reaction temperature (40-140 °C) for 24 h.

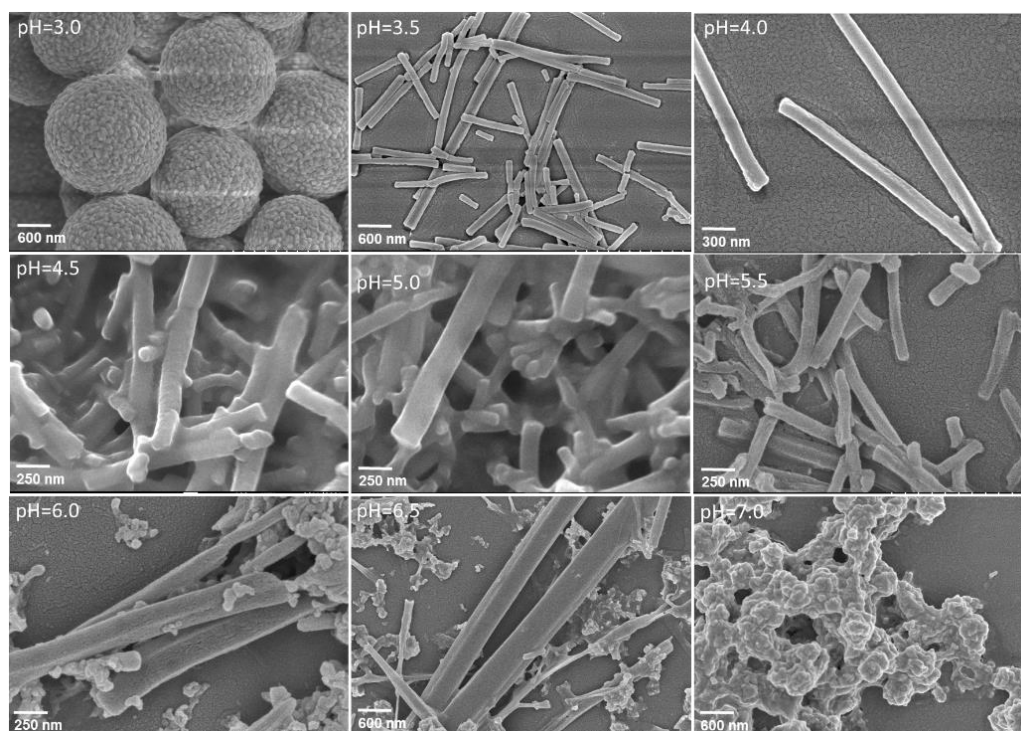

**Figure S33.** SEM images of reaction products using  $\text{Tb}(\text{OAc})_3$  and racemic *R/S*-cyampH<sub>2</sub> ligands as precursor at 100 °C for 24 h (pH = 3.0-7.0).

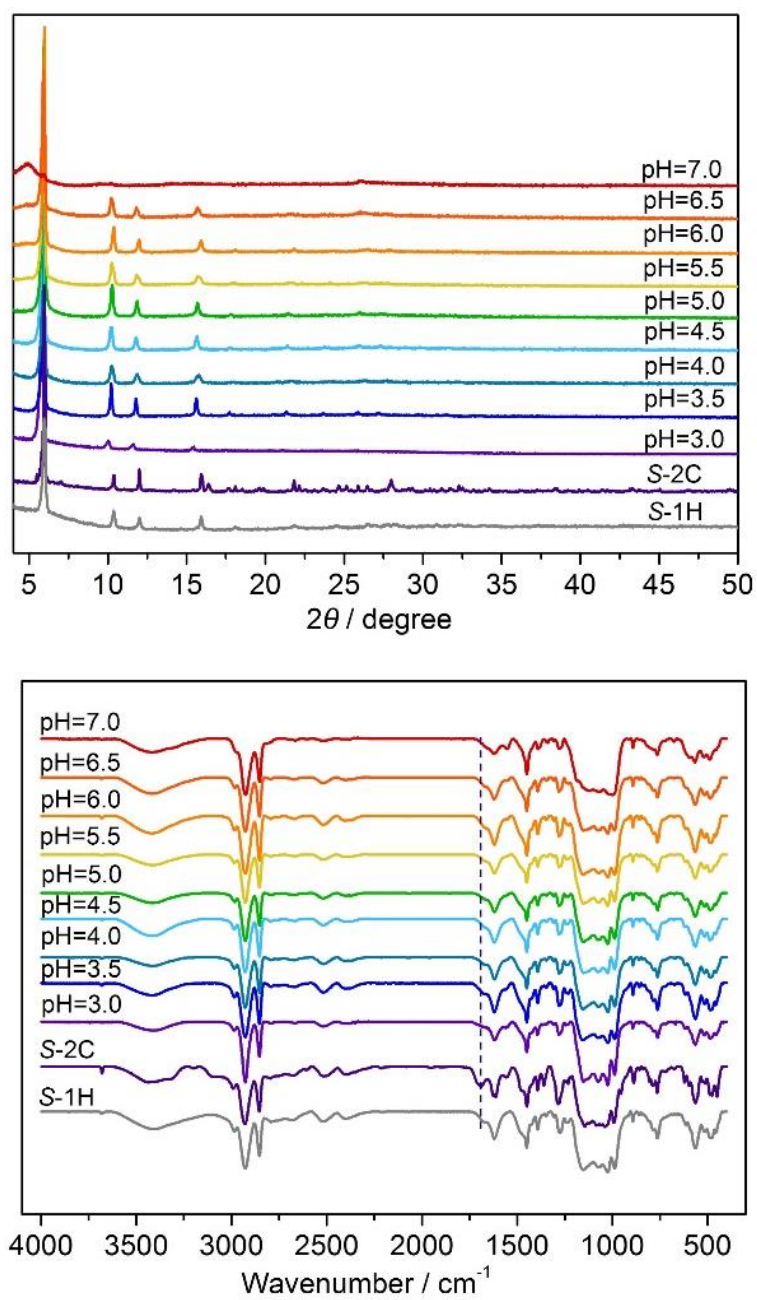

**Figure S34.** The PXRD patterns (top) and IR spectra (bottom) of reaction products using  $\text{Tb}(\text{OAc})_3$  and racemic *R/S*-cyampH<sub>2</sub> ligands as precursors at 100 °C for 24 h (pH = 3.0-7.0).

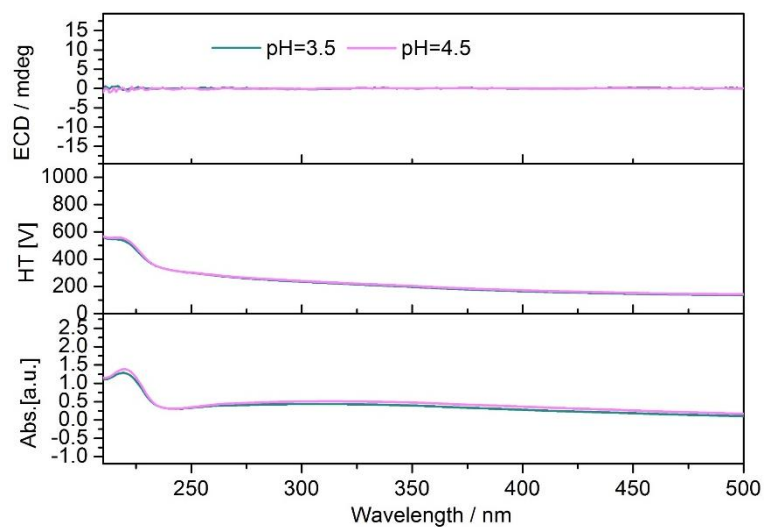

**Figure S35.** ECD spectra of reaction products using  $\text{Tb}(\text{OAc})_3$  and racemic  $R/S$ -cyampH<sub>2</sub> ligands as precursors at 100 °C for 24 h (pH = 3.5, 4.5).

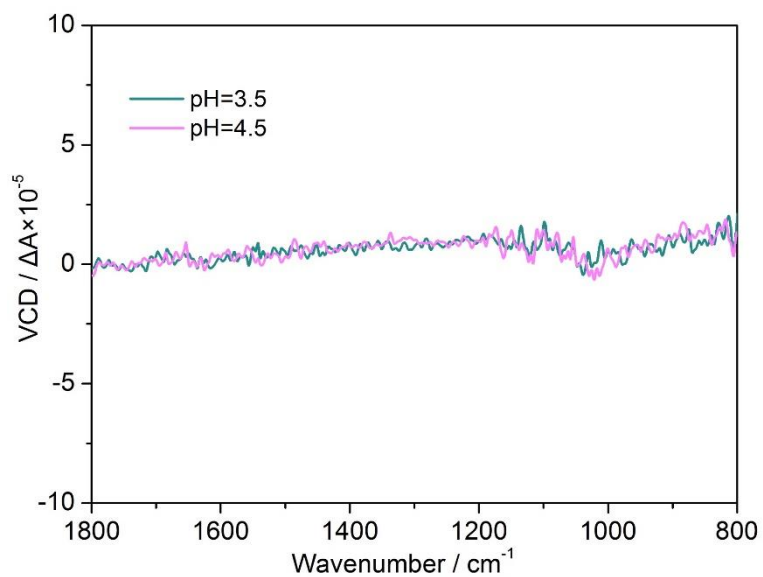

**Figure S36.** The VCD spectra of reaction products using  $\text{Tb}(\text{OAc})_3$  and racemic  $R/S$ -cyampH<sub>2</sub> ligands as precursors at 100 °C for 24 h (pH = 3.5, 4.5).



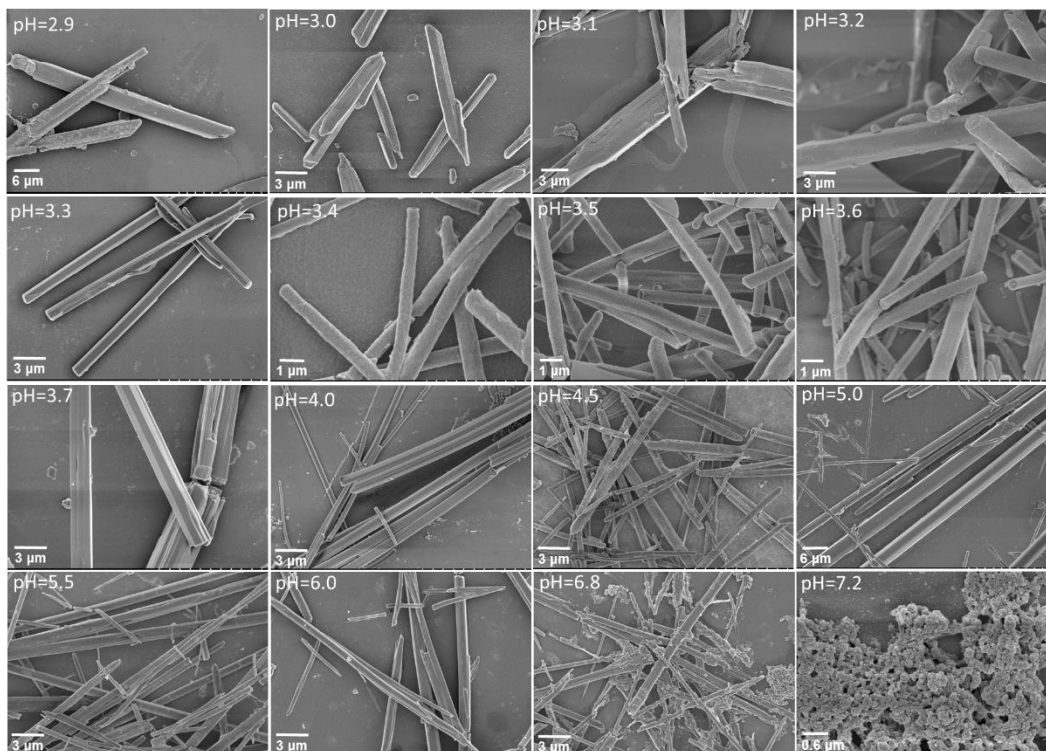

**Figure S37.** The SEM images of reaction products using  $\text{Tb}(\text{OAc})_3$  and  $S\text{-pempH}_2$  ligand as precursors at 100 °C for 24 h (pH = 2.9-7.2).

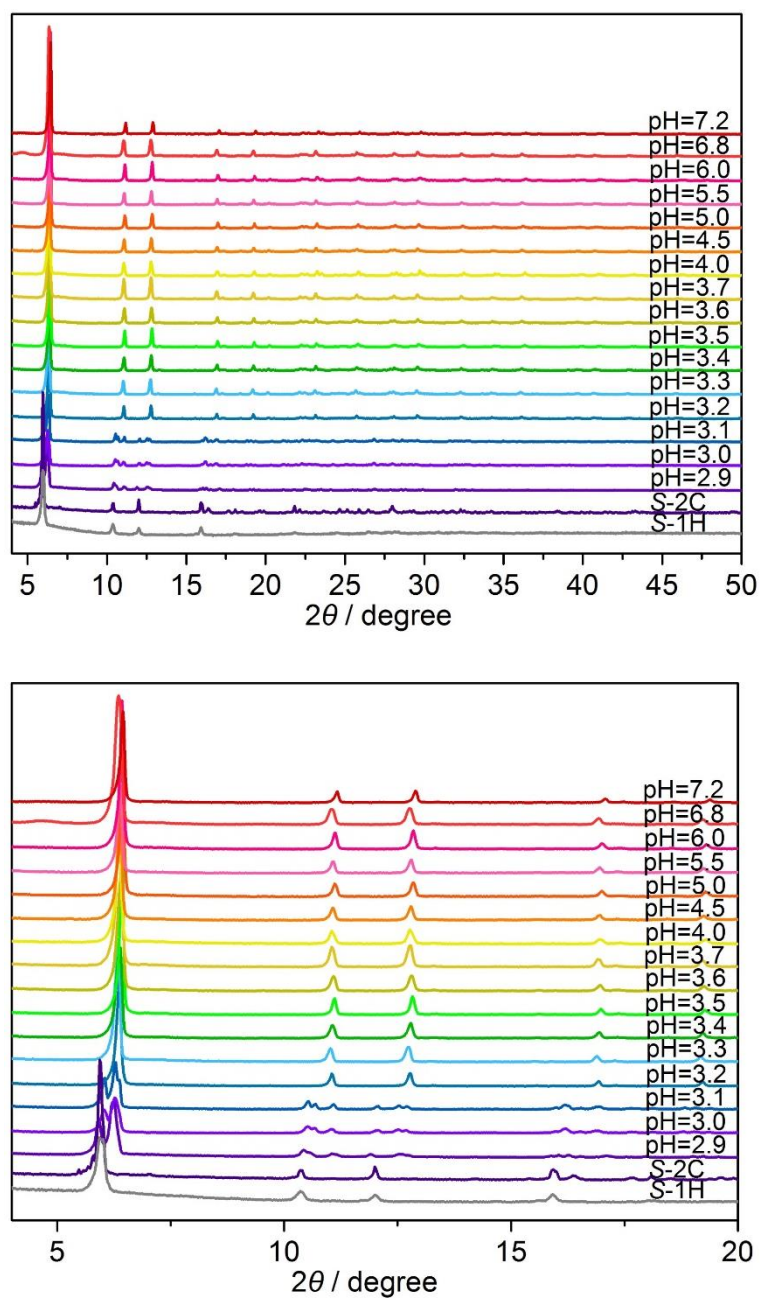

**Figure S38.** The PXRD patterns of reaction products using  $\text{Tb}(\text{OAc})_3$  and S-pempH<sub>2</sub> ligand as precursors at 100 °C for 24 h (pH = 2.9-7.2).

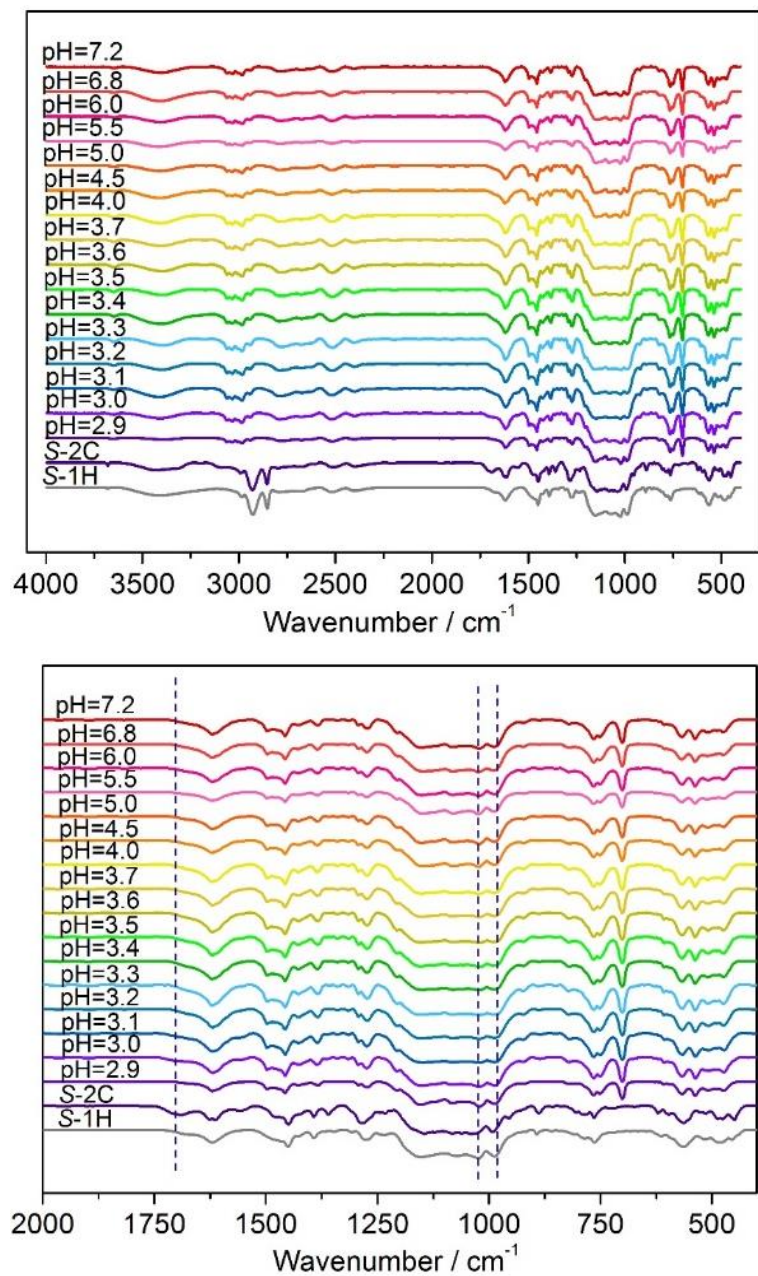

**Figure S39.** The IR spectra of reaction products using  $\text{Tb}(\text{OAc})_3$  and  $\text{S-pempH}_2$  ligand as precursors at 100 °C for 24 h (pH = 2.9-7.2).

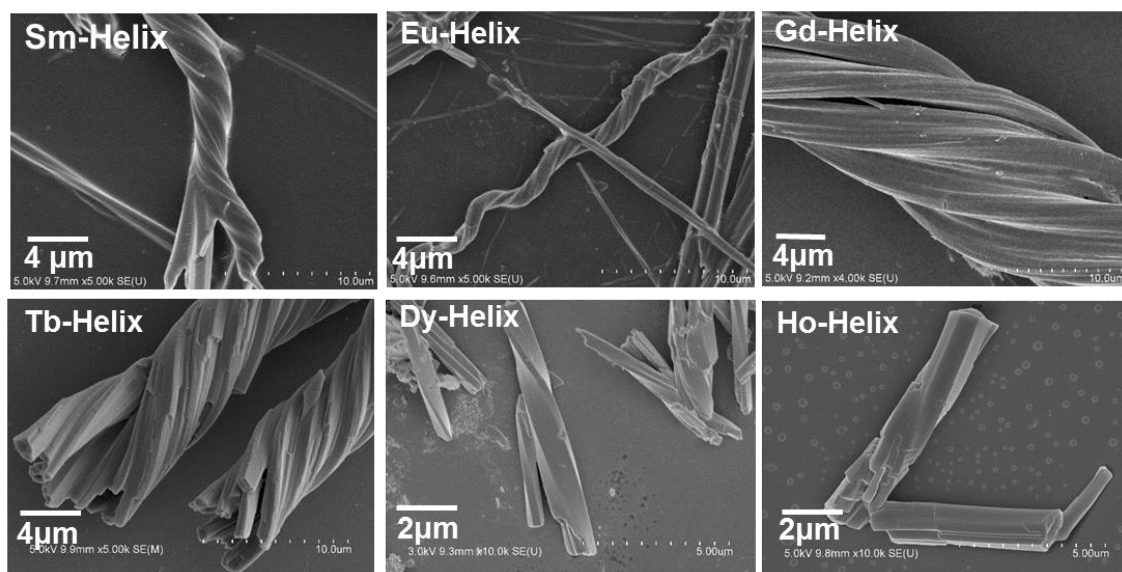

**Figure S40.** SEM images of superhelices obtained using different kinds of rare-earth acetate salt as reaction precursor.

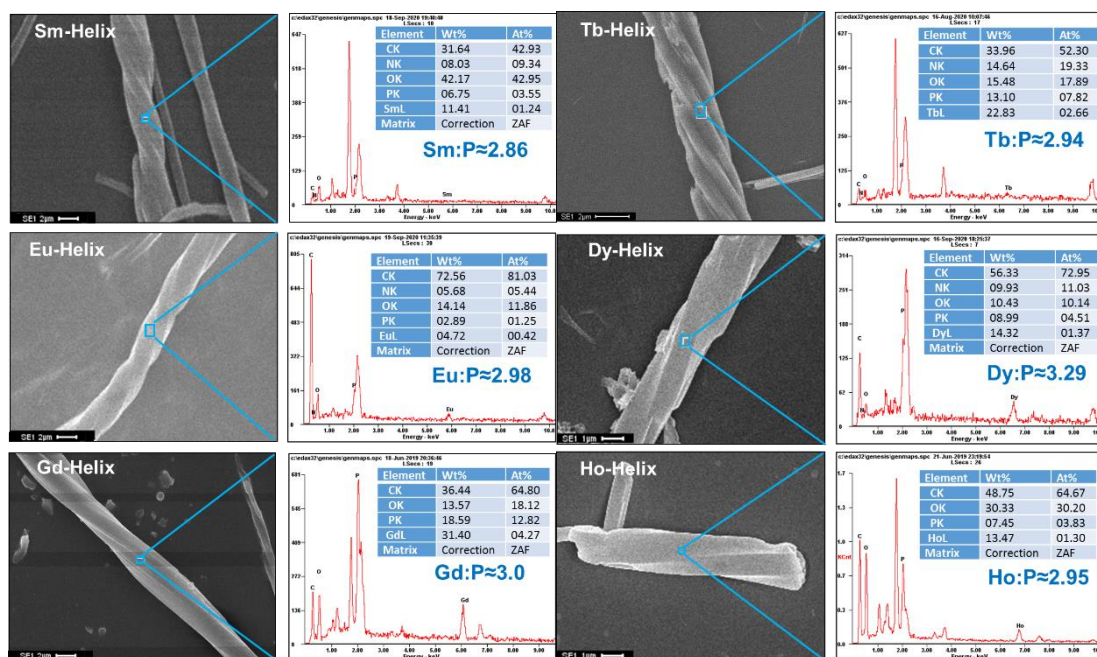

**Figure S41.** SEM images and EDX spectra of superhelices obtained using different kinds of rare-earth acetate as reaction precursor.

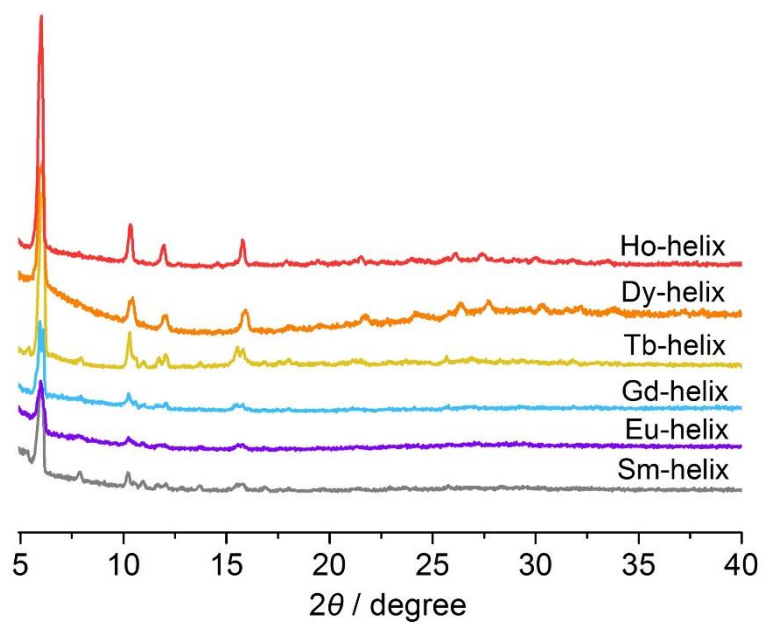

**Figure S42.** PXRD patterns of helices obtained using different kinds of rare-earth acetate as reaction precursor.

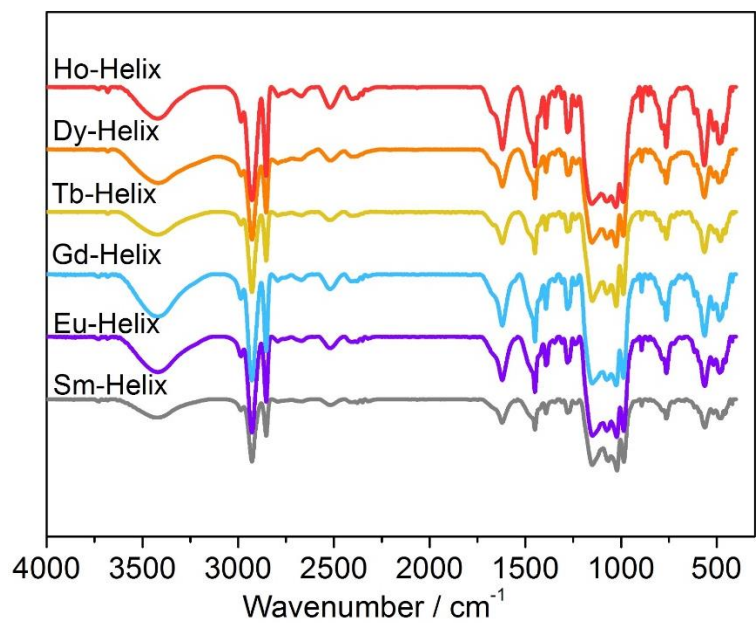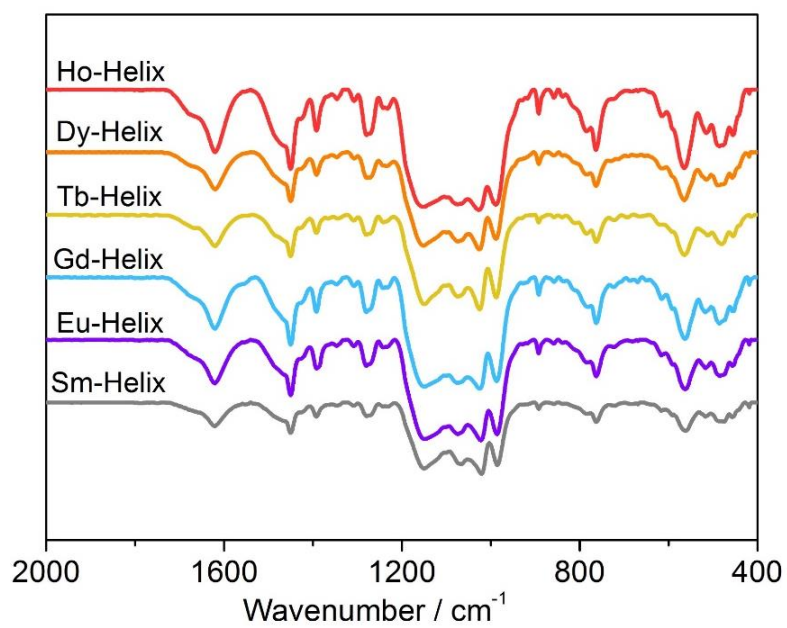

**Figure S43.** Infrared spectra of helices obtained using different kinds of rare-earth acetate as reaction precursor.

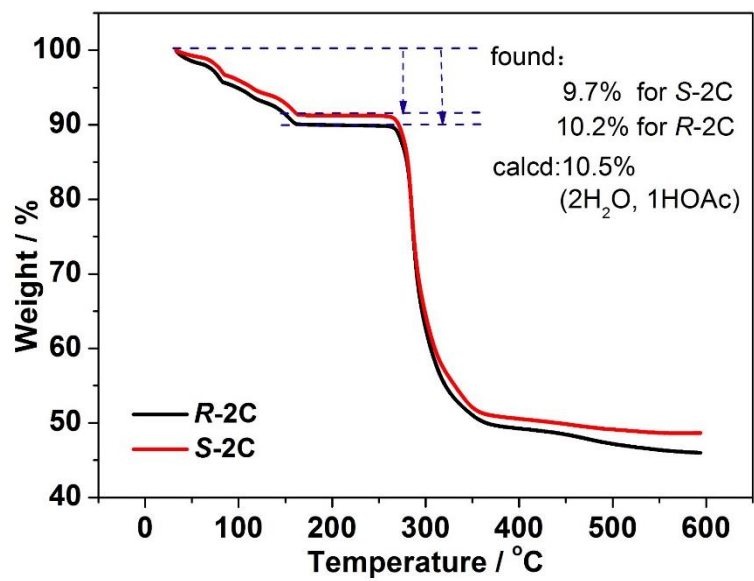

Figure S44. TG analyses of S-2C and R-2C.
